# Supplementary material for: Korean Medicine Clinical Practice Guidelines for Lumbar Herniated Intervertebral Disc in Adults: Based on Grading of Recommendations Assessment, Development and Evaluation (GRADE)
Source: MDPI journal article supplement (doi:10.3390/healthcare10020246), 2022-01-27

## Supplementary S2.

The Grading of Recommendations Assessment, Development and Evaluation (GRADE) Information.

| Outcome measures (Number of studies, study design)       | Risk of bias | Inconsistency | Indirectness | Imprecision | Other consideration |
|----------------------------------------------------------|--------------|---------------|--------------|-------------|---------------------|
| <b>Acupuncture</b>                                       |              |               |              |             |                     |
| CQ1. Total clinical effective rate (23, RCTs)[12-35]     | Not serious  | Not serious   | Not serious  | Not serious | Not serious         |
| Pain (15, RCTs)[12-26]                                   | Not serious  | Serious       | Not serious  | Not serious | Not serious         |
| Function (4, RCTs)[13,14,16,33]                          | Not serious  | Serious       | Not serious  | Serious     | Not serious         |
| CQ2. Total clinical effective rate (13, RCTs)[20, 36-44] | Not serious  | Serious       | Not serious  | Not serious | Not serious         |
| Pain (5, RCTs)[36, 42-45]                                | Not serious  | Serious       | Not serious  | Not serious | Not serious         |
| Function (ODI) (2, RCTs)[36, 43]                         | Not serious  | Not serious   | Not serious  | Serious     | Not serious         |
| Function (JOA) (3, RCTs)[44,46,47]                       | Not serious  | Serious       | Not serious  | Serious     | Not serious         |
| CQ3.Total clinical effective rate (7, RCTs)[22, 53-57]   | Not serious  | Not serious   | Not serious  | Not serious | Not serious         |
| Pain (6, RCTs)[52-56]                                    | Not serious  | Serious       | Not serious  | Not serious | Not serious         |
| Function (ODI) (2, RCTs)[52, 55]                         | Not serious  | Not serious   | Not serious  | Serious     | Not serious         |
| CQ4.Total clinical effective rate (7, RCTs)[59-65]       | Not serious  | Serious       | Not serious  | Not serious | Not serious         |

|                                           |          |           |      |      |             |             |             |              |             |
|-------------------------------------------|----------|-----------|------|------|-------------|-------------|-------------|--------------|-------------|
| Pain (1, RCTs)[58]                        |          |           |      |      | Serious     | Not serious | Not serious | Very serious | Not serious |
| <b>Moxibustion</b>                        |          |           |      |      |             |             |             |              |             |
| CQ5.Total RCTs)[66]                       | clinical | effective | rate | (1,  | Not serious | Not serious | Not serious | Very serious | Not serious |
| CQ6.Total RCTs)[47, 57, 69-71]            | clinical | effective | rate | (5,  | Not serious | Not serious | Not serious | Not serious  | Not serious |
| Pain (1, RCTs)[69]                        |          |           |      |      | Not serious | Not serious | Not serious | Serious      | Not serious |
| Function (JOA) (4, RCTs)[47, 69-71]       |          |           |      |      | Not serious | Serious     | Not serious | Not serious  | Not serious |
| CQ7.Total RCTs)[74,75]                    | clinical | effective | rate | (2,  | Serious     | Not serious | Not serious | Serious      | Not serious |
| Function (m-JOA) (2, RCTs)[72,73]         |          |           |      |      | Not serious | Not serious | Not serious | Serious      | Not serious |
| <b>Herbal medicine</b>                    |          |           |      |      |             |             |             |              |             |
| CQ8. Total RCTs)[76, 79-82]               | clinical | effective | rate | (5,  | Not serious | Not serious | Not serious | Not serious  | Not serious |
| Pain (3, RCTs)[76-78]                     |          |           |      |      | Not serious | Serious     | Not serious | Serious      | Not serious |
| Function (ODI) (3, RCTs)[76-78]           |          |           |      |      | Not serious | Serious     | Not serious | Serious      | Not serious |
| Function (JOA) (1, RCTs)[79]              |          |           |      |      | Not serious | Not serious | Not serious | Serious      | Not serious |
| CQ9. Total RCTs)[40,41,83,85-100,102-103] | clinical | effective | rate | (21, | Not serious | Not serious | Not serious | Not serious  | Not serious |
| Pain (10, RCTs)[83,84,94,97-103]          |          |           |      |      | Not serious | Serious     | Not serious | Not serious  | Not serious |
| Function (ODI) (1, RCTs)[83]              |          |           |      |      | Serious     | Not serious | Not serious | Serious      | Not serious |

|                                                                              |             |             |             |             |             |
|------------------------------------------------------------------------------|-------------|-------------|-------------|-------------|-------------|
| Function (JOA) (4, RCTs)[85,97,98,101]                                       | Not serious | Serious     | Not serious | Not serious | Not serious |
| <b>Pharmacopuncture</b>                                                      |             |             |             |             |             |
| CQ10. Total clinical effective rate (5, RCTs)[76, 105, 107, 109]             | Not serious | Not serious | Not serious | Serious     | Not serious |
| Pain (8, RCTs)[97, 104-109]                                                  | Not serious |
| Function (ODI) (1, RCTs)[110]                                                | Not serious | Not serious | Not serious | Serious     | Not serious |
| Function (ODIc) (3, RCTs)[104, 106, 109]                                     | Not serious | Not serious | Not serious | Serious     | Not serious |
| Function (JOA) (1, RCTs)[97]                                                 | Not serious | Not serious | Not serious | Serious     | Not serious |
| <b>Chuna manual therapy</b>                                                  |             |             |             |             |             |
| CQ11. Total clinical effective rate (10, RCTs)[111-120]                      | Not serious |
| Pain (5, RCTs)[111-115]                                                      | Not serious |
| Function (ODI) (1, RCTs)[113]                                                | Not serious | Not serious | Not serious | Serious     | Not serious |
| Function (JOA) (1, RCTs)[116]                                                | Not serious | Not serious | Not serious | Serious     | Not serious |
| CQ12. Total clinical effective rate (29, RCTs)[36, 39, 89, 99, 121, 124-147] | Not serious | Serious     | Not serious | Not serious | Not serious |
| Pain (8, RCTs)[36, 99, 121-126]                                              | Not serious | Serious     | Not serious | Not serious | Not serious |
| Function (ODI) (2, RCTs)[36, 124]                                            | Not serious | Serious     | Not serious | Serious     | Not serious |
| Function (JOA) (4, RCTs)[46, 124, 127, 128]                                  | Not serious | Serious     | Not serious | Not serious | Not serious |

|                                                             |             |             |             |              |             |  |
|-------------------------------------------------------------|-------------|-------------|-------------|--------------|-------------|--|
| <b>Thread-embedding acupuncture</b>                         |             |             |             |              |             |  |
| CQ13. Total clinical effective rate (12, RCTs)[148-159]     | Serious     | Not serious | Not serious | Not serious  | Not serious |  |
| Pain (4, RCTs)[148-151]                                     | Serious     | Serious     | Not serious | Serious      | Not serious |  |
| Function (ODI) (1, RCTs)[151]                               | Not serious | Not serious | Not serious | Serious      | Not serious |  |
| Function (JOA) (1, RCTs)[148]                               | Not serious | Not serious | Not serious | Serious      | Not serious |  |
| CQ14. Total clinical effective rate (6, RCTs)[160, 162-166] | Not serious | Serious     | Not serious | Not serious  | Not serious |  |
| Pain (2, RCTs)[160, 161]                                    | Not serious | Serious     | Not serious | Serious      | Not serious |  |
| Function (ODI) (2, RCTs)[160, 161]                          | Not serious | Serious     | Not serious | Serious      | Not serious |  |
| Function (JOA) (1, RCTs)[160]                               | Not serious | Not serious | Not serious | Serious      | Not serious |  |
| <b>Cupping</b>                                              |             |             |             |              |             |  |
| CQ15. Total clinical effective rate (5, RCTs)[167-171]      | Not serious | Not serious | Not serious | Not serious  | Not serious |  |
| Pain (1, RCTs)[167]                                         | Not serious | Not serious | Not serious | Very serious | Not serious |  |

PRISMA flow chart

CQ1. Acupuncture vs. active control treatment

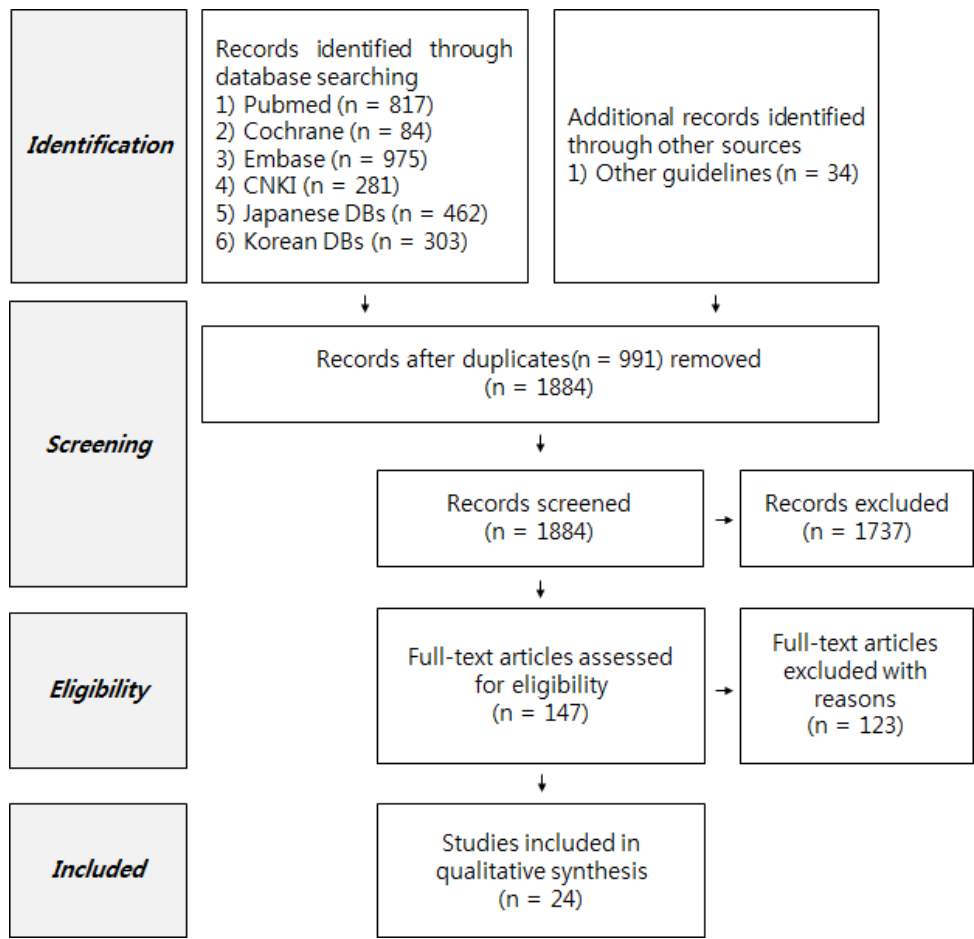

CQ2. Acupuncture + usual conventional therapy vs. acupuncture

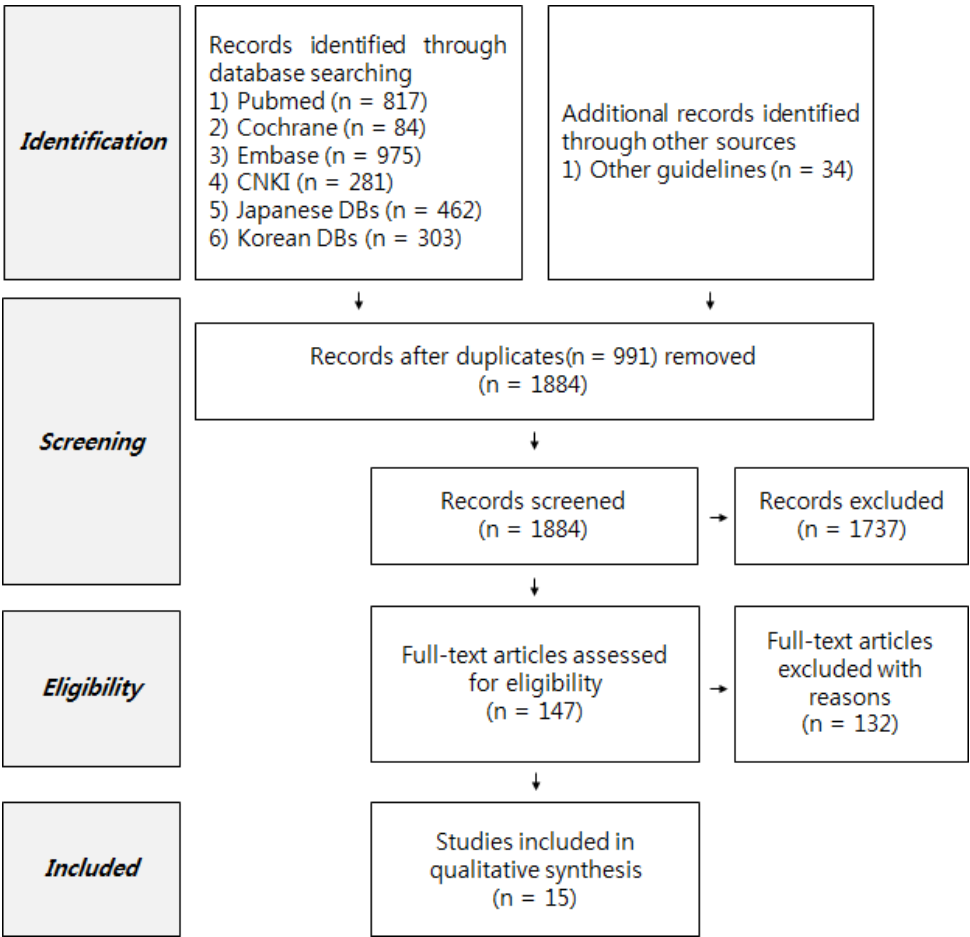

CQ3. Electroacupuncture, fire needling or warm needling vs. acupuncture

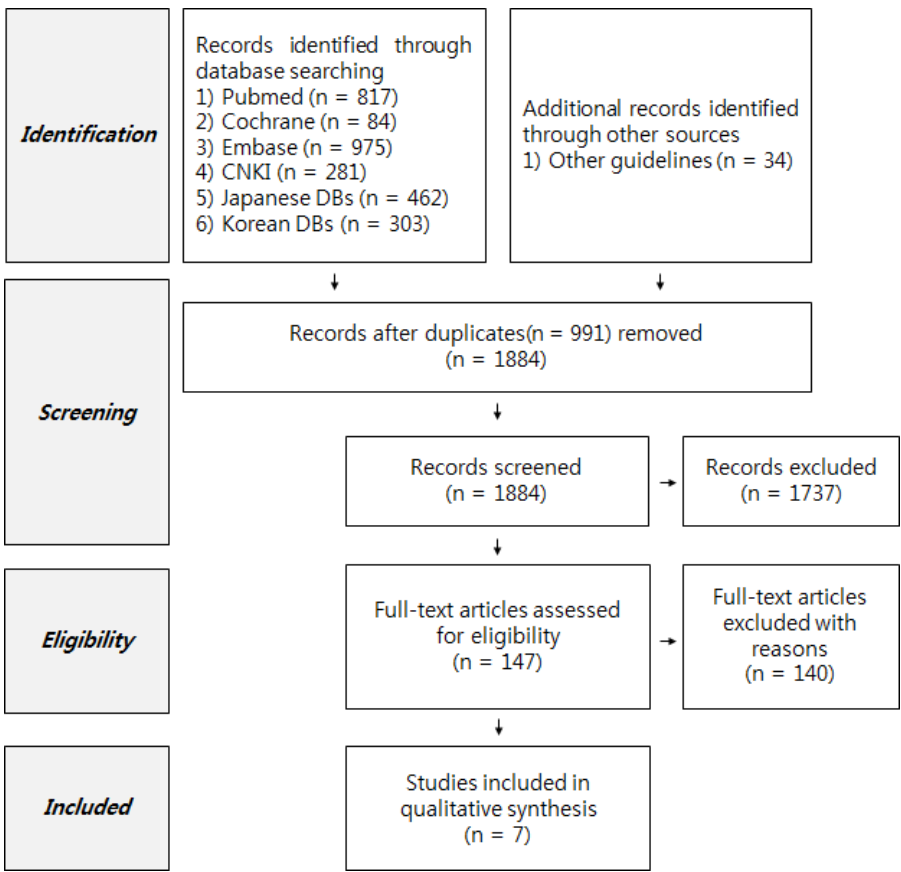

CQ4. Deep insertion acupuncture vs. superficial insertion acupuncture

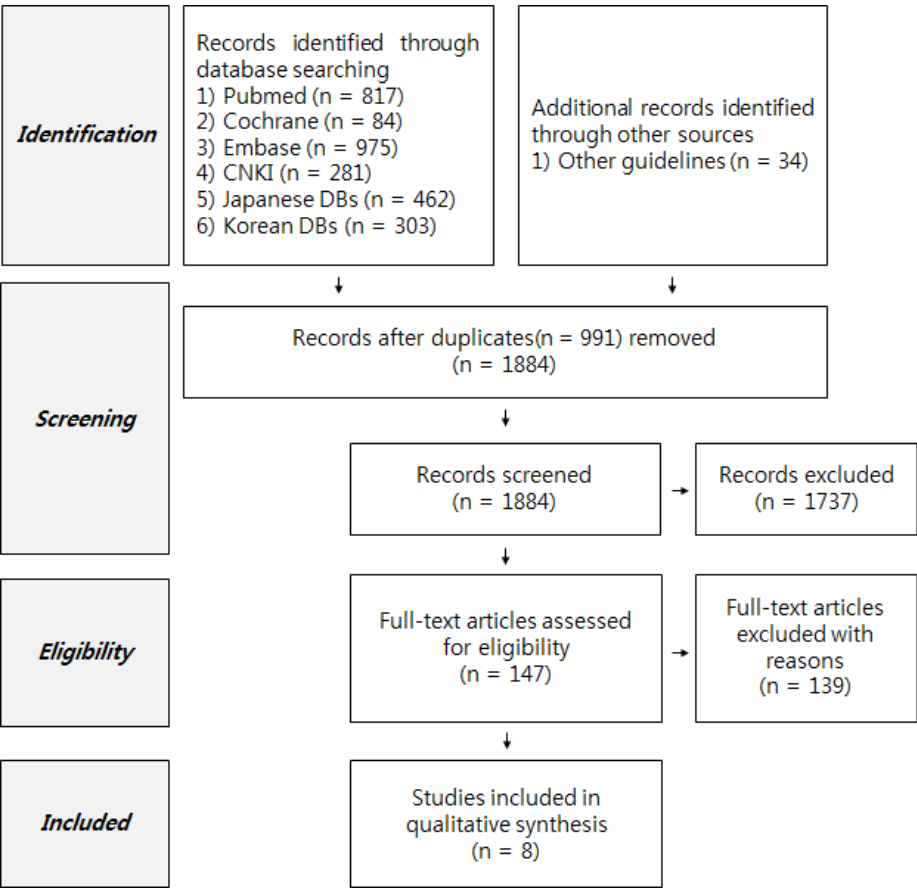



CQ5. Moxibustion vs. active control group

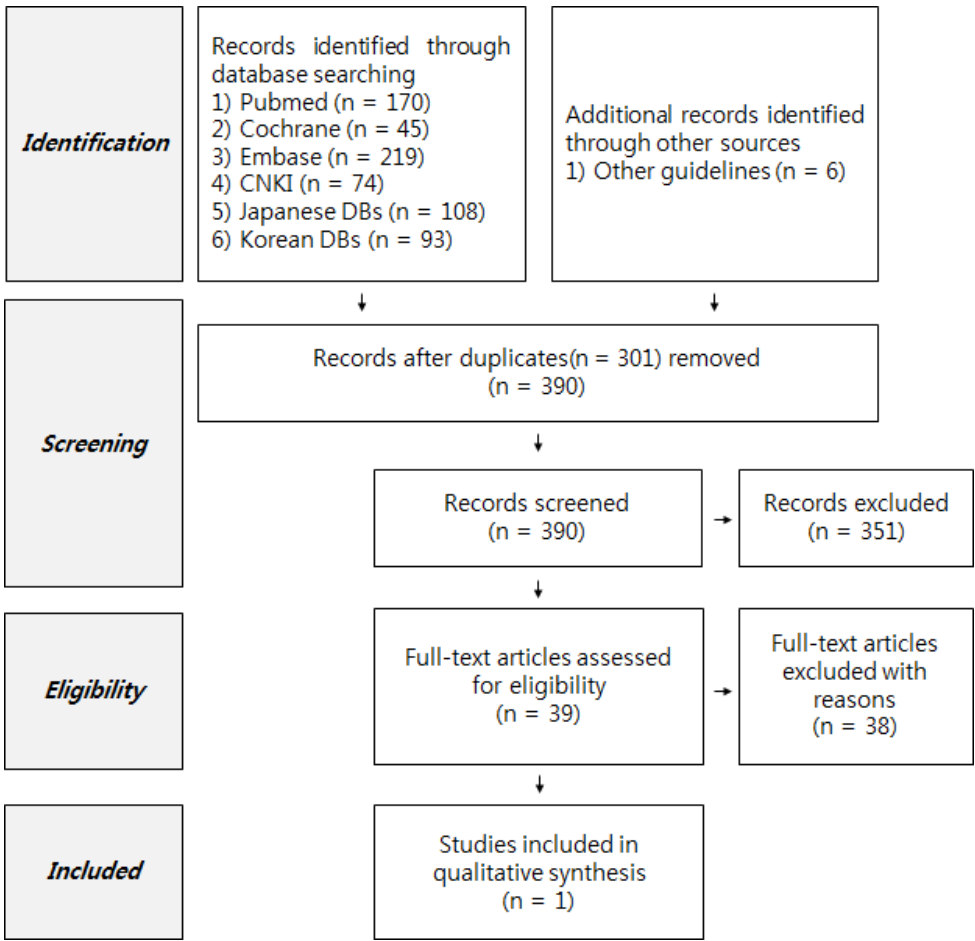

CQ6. Moxibustion + usual conventional therapy vs. moxibustion

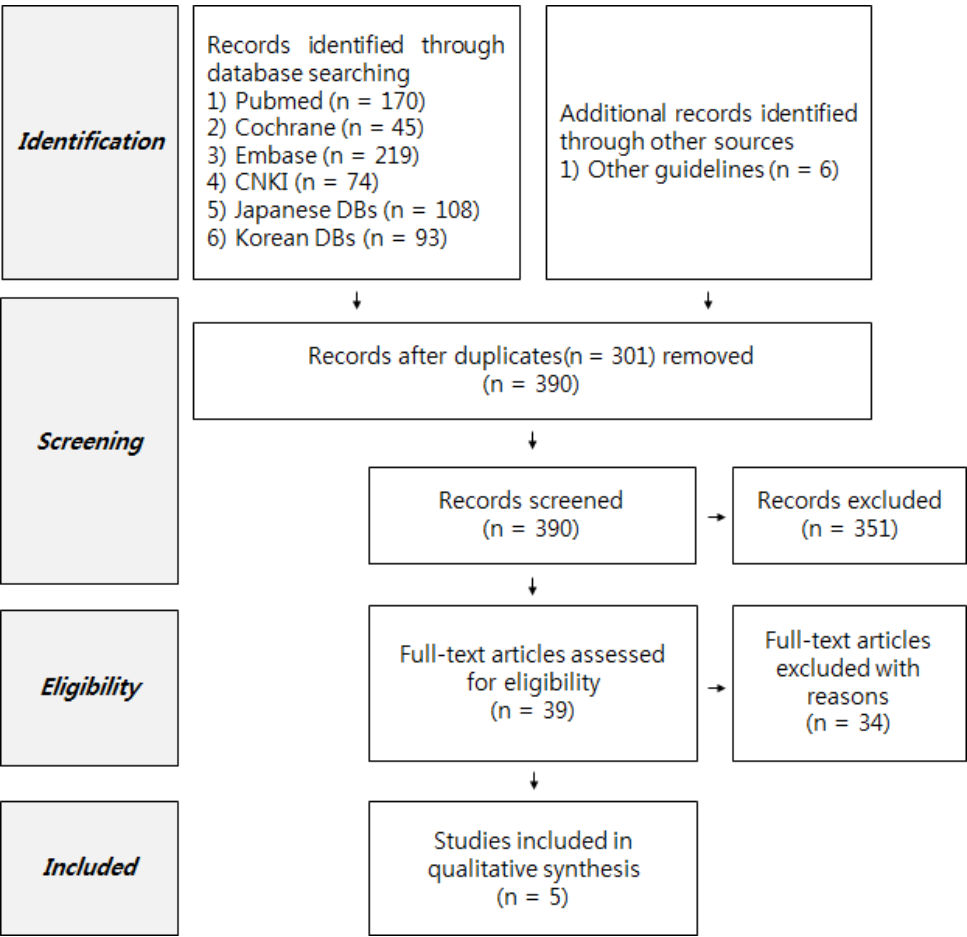

CQ7. Moxibustion causing deqi sensation vs. moxibustion not causing deqi sensation

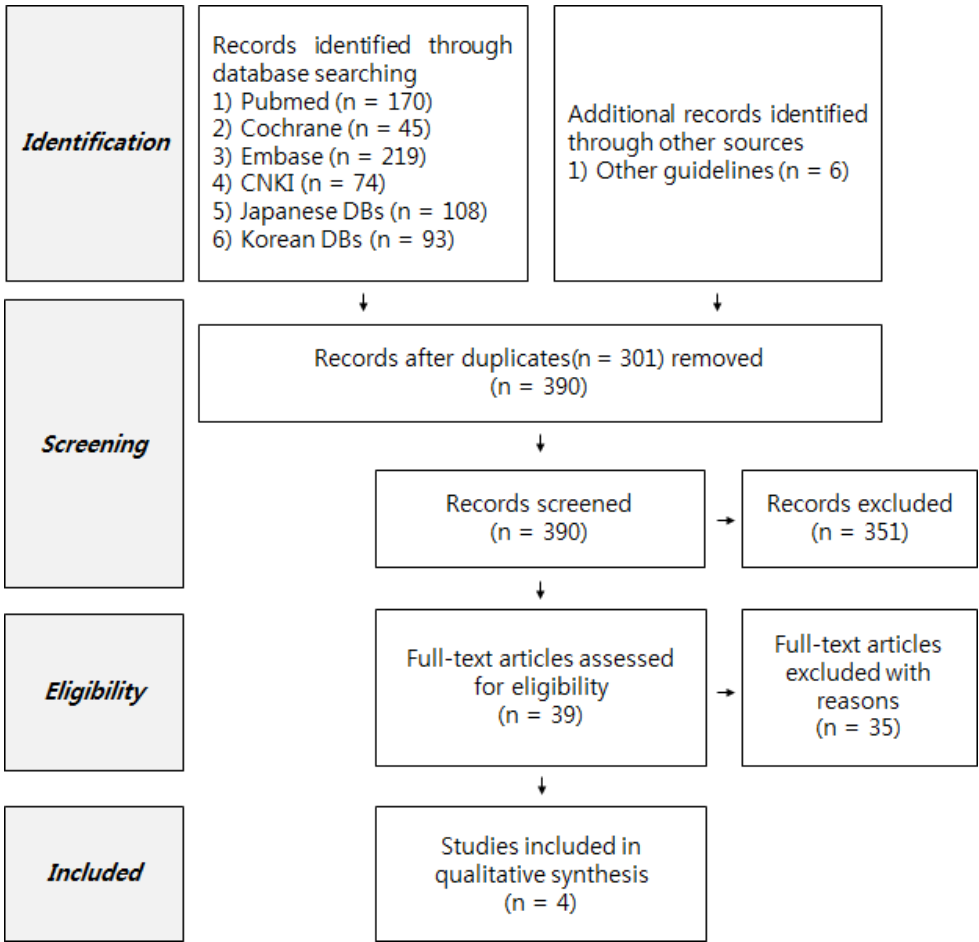

CQ8. Herbal medicine vs. active control treatment

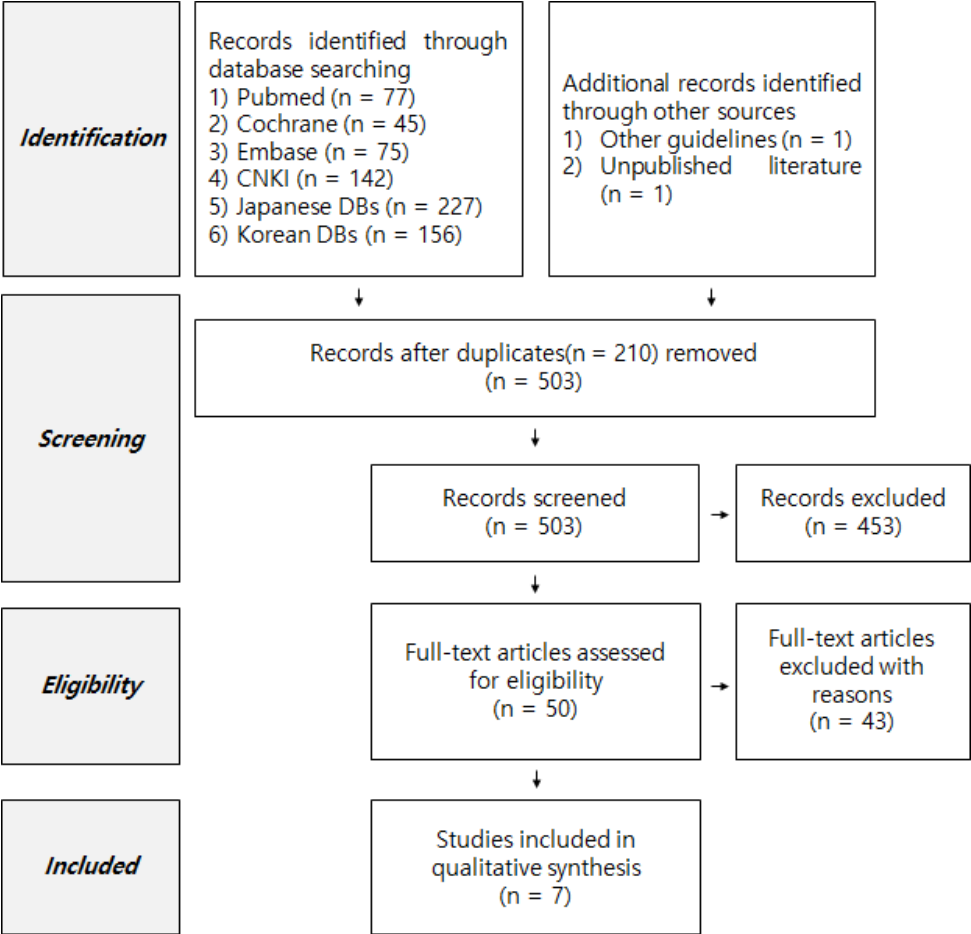

CQ9. Herbal medicine + usual conventional therapy vs. herbal medicine

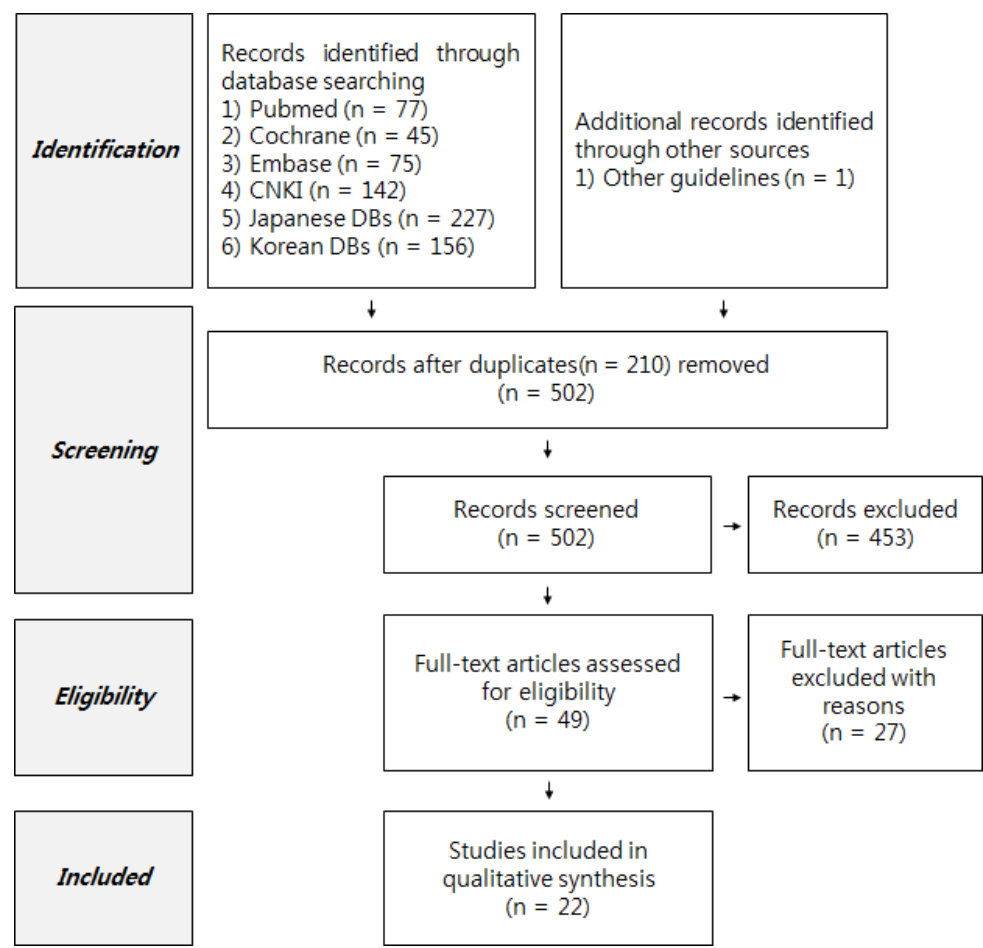

CQ10. Pharmacopuncture + usual conventional therapy vs. pharmacopuncture

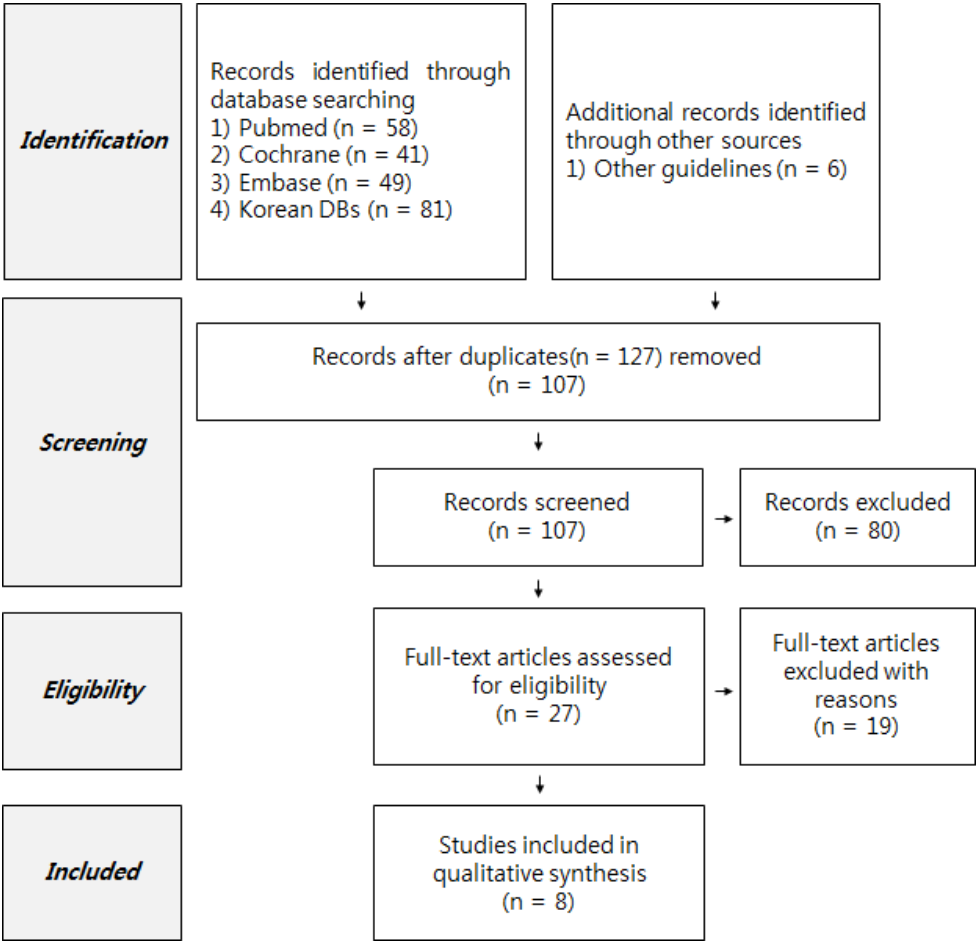

CQ11. Chuna manual therapy vs, active control treatment

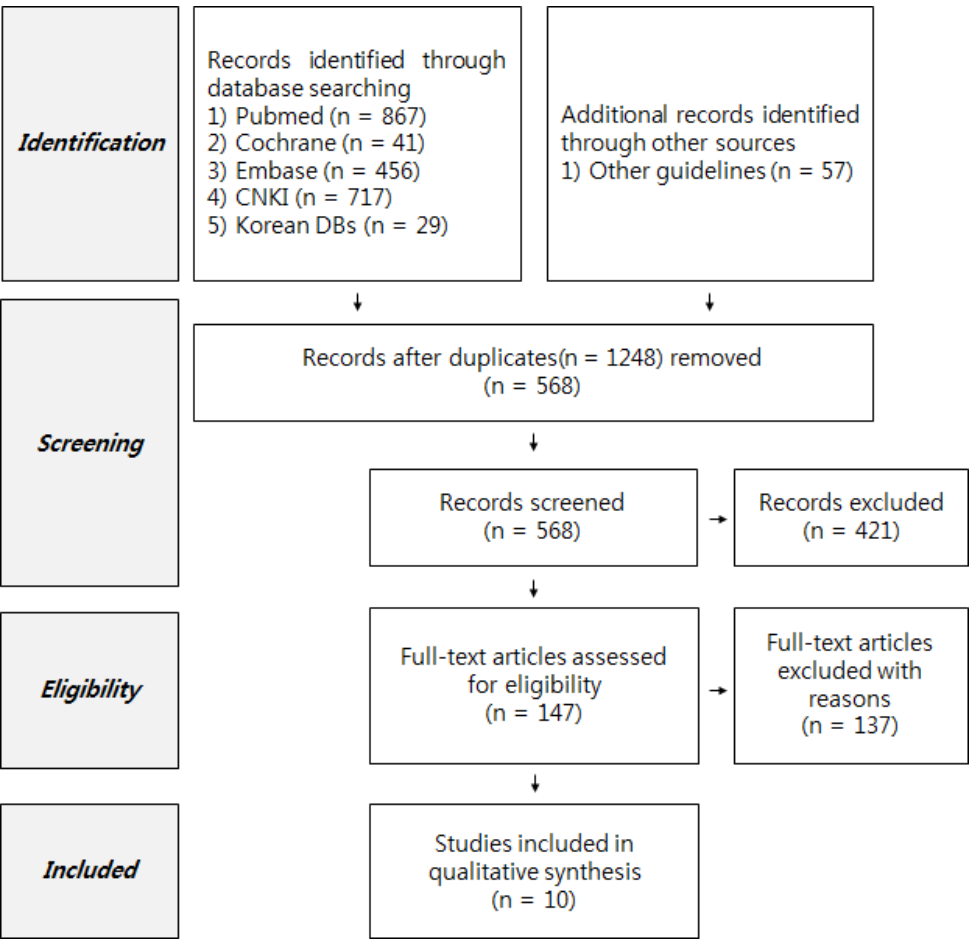

CQ12. Chuna manual therapy + usual conventional therapy vs. usual conventional therapy

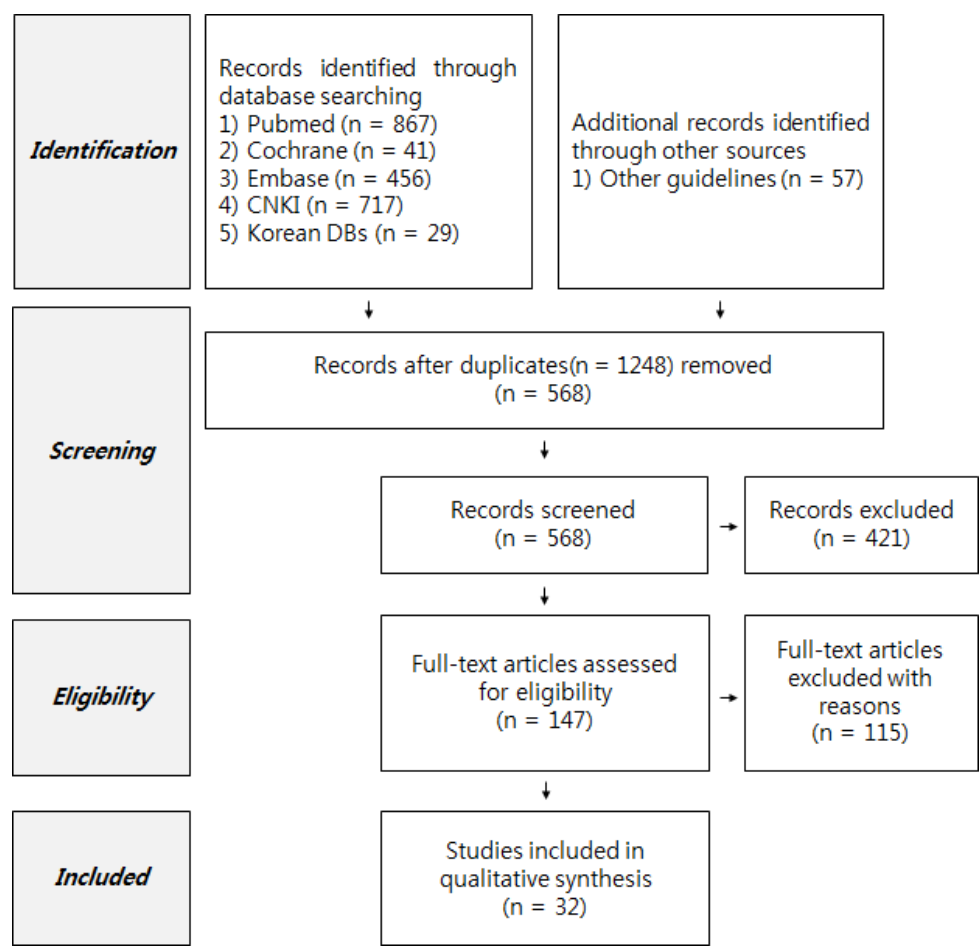



CQ13. TEA vs. active control treatment

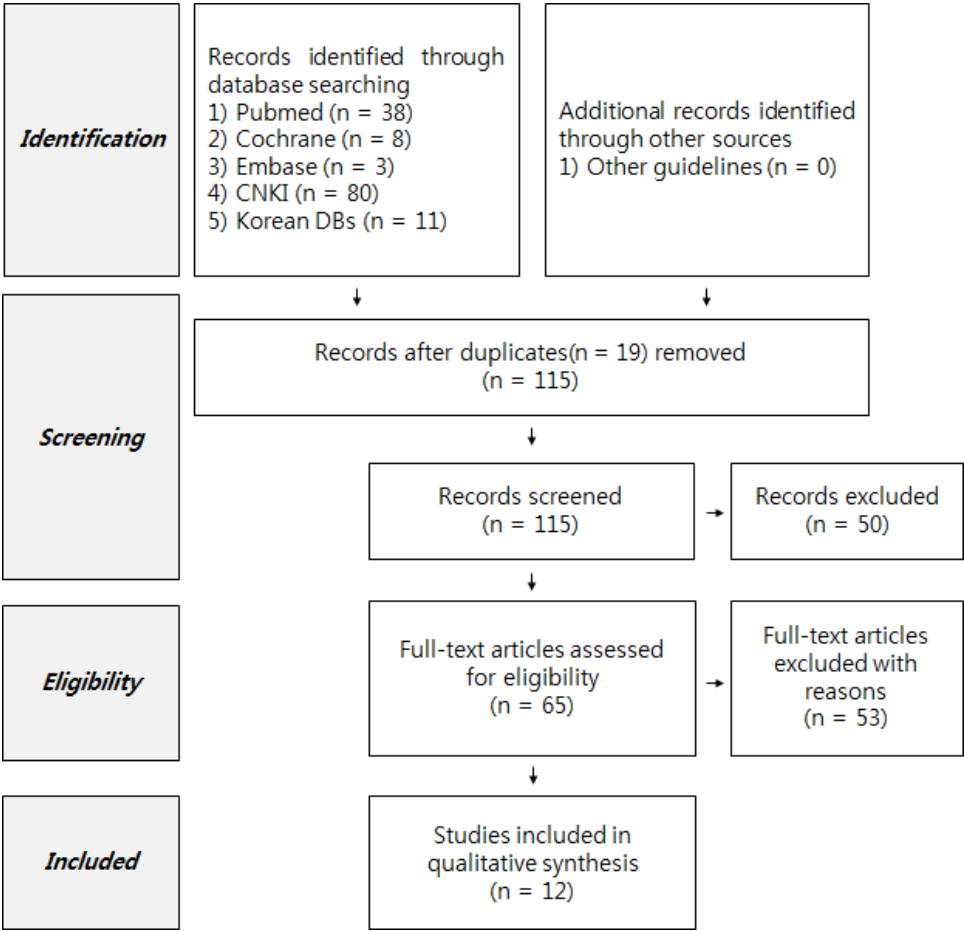

CQ14. TEA + usual conventional therapy vs. TEA

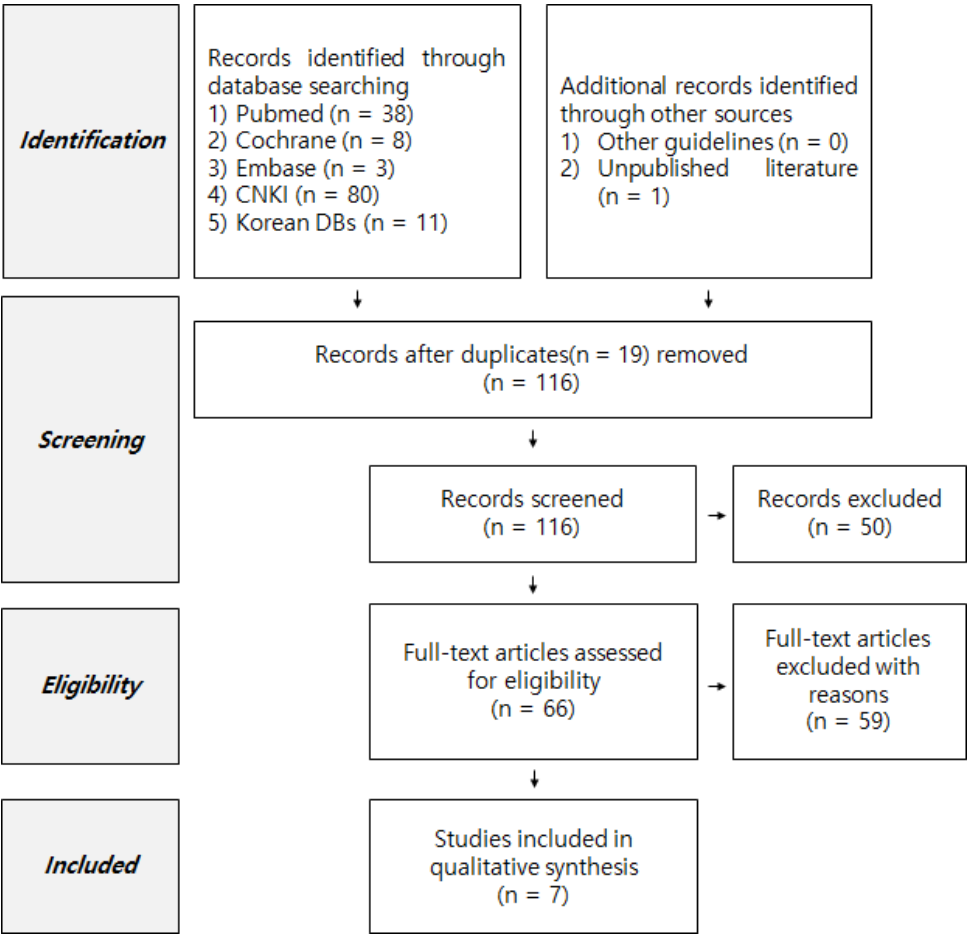

CQ15. Cupping + usual conventional therapy vs. usual conventional therapy

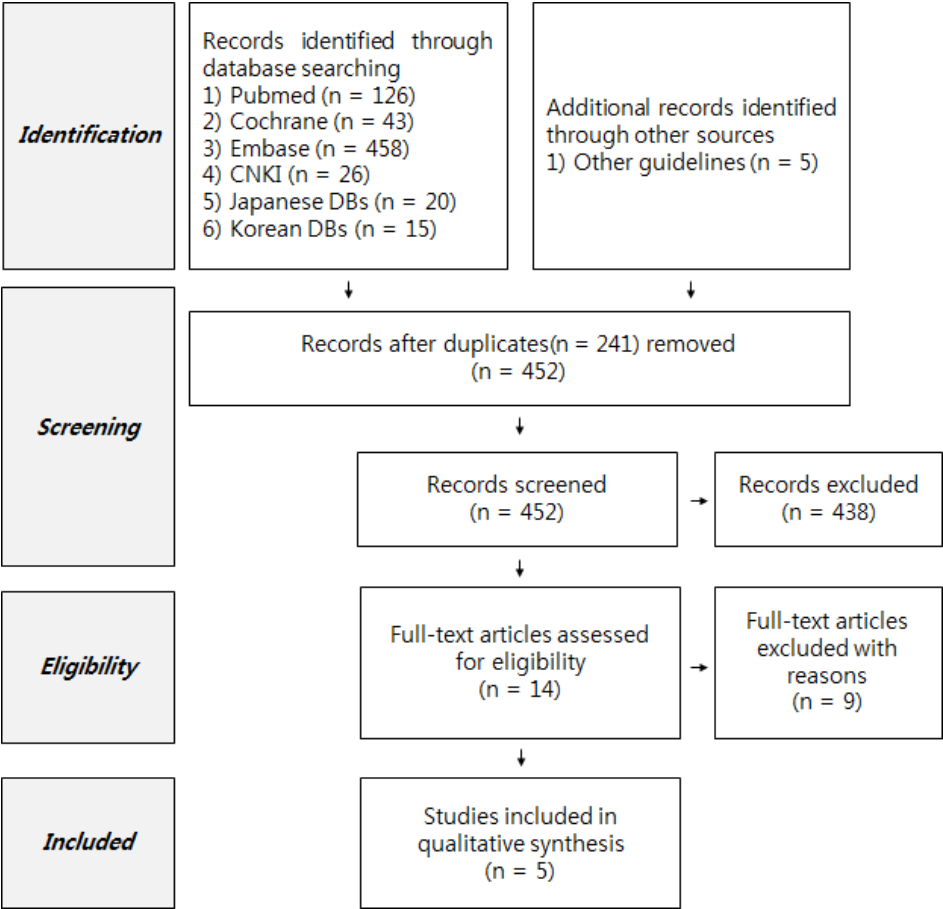

Supplement: s1 [file s1]
