# Supplementary material for: Korean Medicine Clinical Practice Guidelines for Lumbar Herniated Intervertebral Disc in Adults: Based on Grading of Recommendations Assessment, Development and Evaluation (GRADE)
Source: MDPI journal article supplement (doi:10.3390/healthcare10020246), 2022-01-27

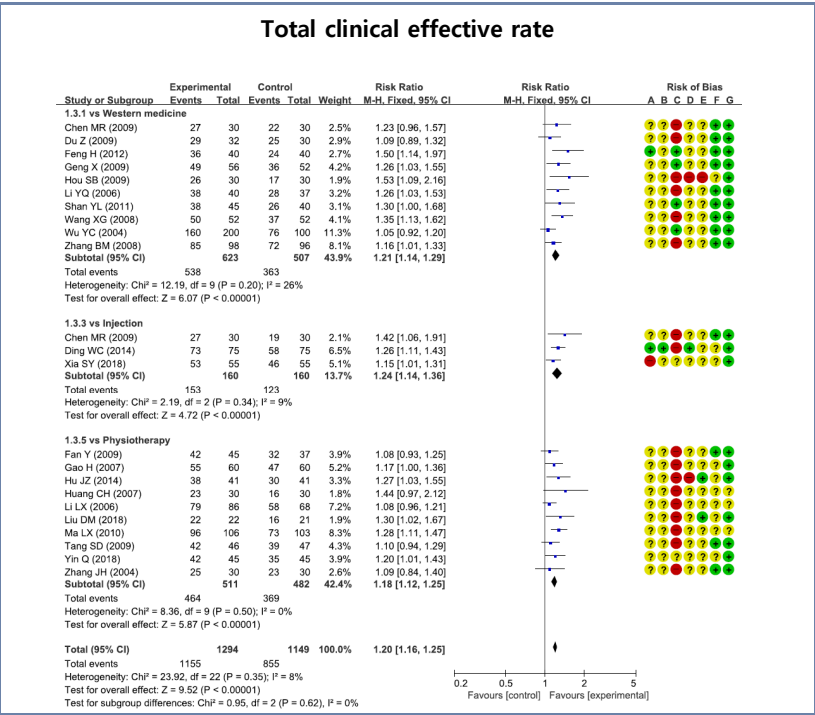

## VAS

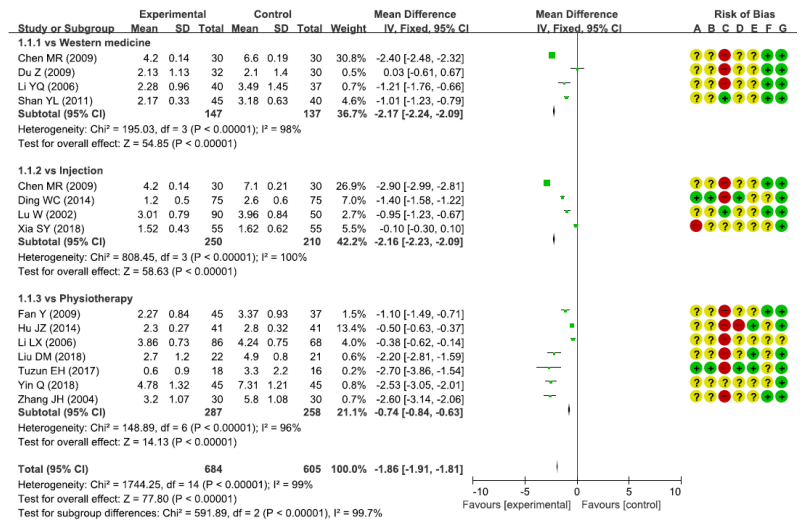

## JOA

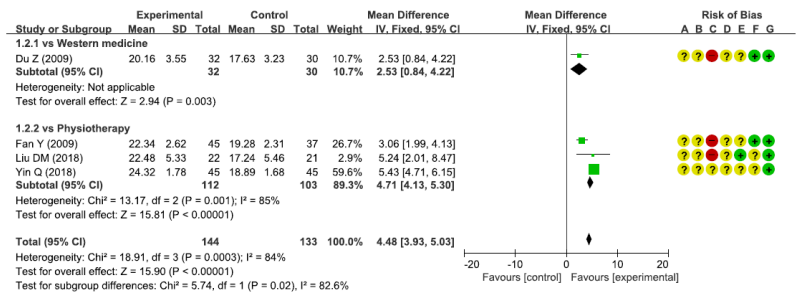

Acupuncture + usual conventional therapy vs. usual conventional therapy

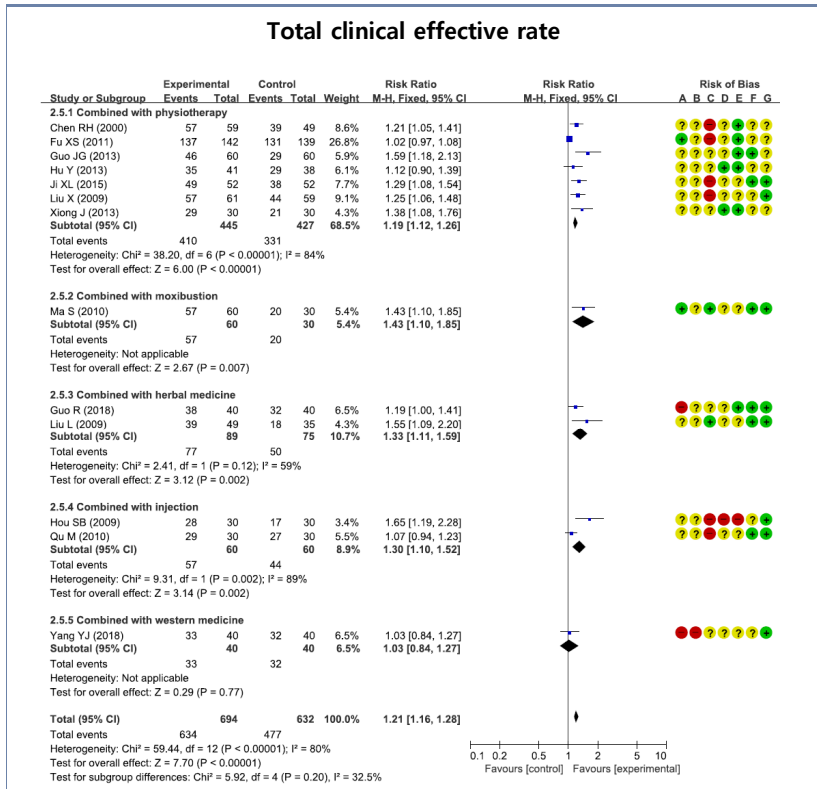

## VAS

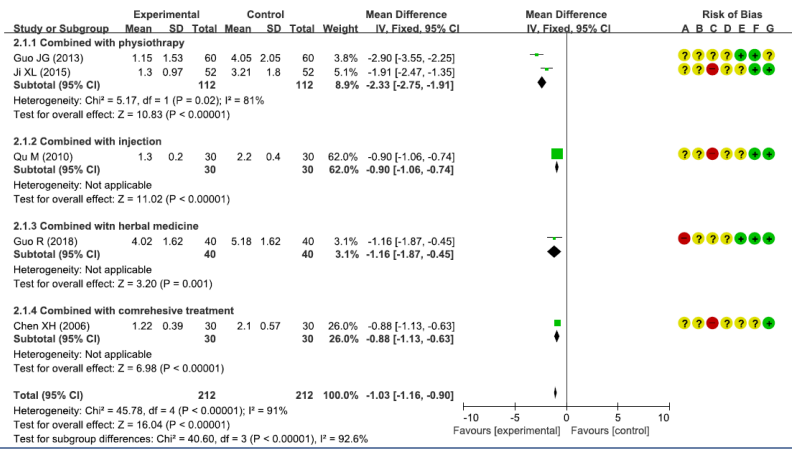

## ODI

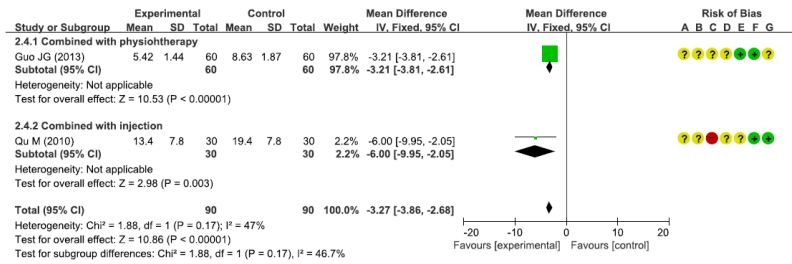

**JOA**

| Study or Subgroup                                                                                    | Experimental |      |       | Control |      |       | Mean Difference |                   | Mean Difference<br>IV, Fixed, 95% CI | Risk of Bias<br>A B C D E F G |
|------------------------------------------------------------------------------------------------------|--------------|------|-------|---------|------|-------|-----------------|-------------------|--------------------------------------|-------------------------------|
|                                                                                                      | Mean         | SD   | Total | Mean    | SD   | Total | Weight          | IV, Fixed, 95% CI |                                      |                               |
| <b>2.3.1 Combined with Physiotherapy</b>                                                             |              |      |       |         |      |       |                 |                   |                                      |                               |
| Chen Y (2010)                                                                                        | 37.1         | 1.56 | 30    | 33.67   | 1.68 | 30    | 40.3%           | 3.43 [2.61, 4.25] |                                      | ?                             |
| Subtotal (95% CI)                                                                                    |              |      | 30    |         |      | 30    | 40.3%           | 3.43 [2.61, 4.25] |                                      | ?                             |
| Heterogeneity: Not applicable                                                                        |              |      |       |         |      |       |                 |                   |                                      |                               |
| Test for overall effect: Z = 8.19 (P < 0.00001)                                                      |              |      |       |         |      |       |                 |                   |                                      |                               |
| <b>2.3.2 Combined with moxibustion</b>                                                               |              |      |       |         |      |       |                 |                   |                                      |                               |
| Ma S (2010)                                                                                          | 24.9         | 2.7  | 60    | 17.8    | 4.1  | 30    | 10.4%           | 7.10 [5.48, 8.72] |                                      | ?                             |
| Subtotal (95% CI)                                                                                    |              |      | 60    |         |      | 30    | 10.4%           | 7.10 [5.48, 8.72] |                                      | ?                             |
| Heterogeneity: Not applicable                                                                        |              |      |       |         |      |       |                 |                   |                                      |                               |
| Test for overall effect: Z = 8.60 (P < 0.00001)                                                      |              |      |       |         |      |       |                 |                   |                                      |                               |
| <b>2.3.3 Combined with herbal medicine</b>                                                           |              |      |       |         |      |       |                 |                   |                                      |                               |
| Guo R (2018)                                                                                         | 14.73        | 2.04 | 40    | 10.92   | 1.25 | 40    | 49.3%           | 3.81 [3.07, 4.55] |                                      | ?                             |
| Subtotal (95% CI)                                                                                    |              |      | 40    |         |      | 40    | 49.3%           | 3.81 [3.07, 4.55] |                                      | ?                             |
| Heterogeneity: Not applicable                                                                        |              |      |       |         |      |       |                 |                   |                                      |                               |
| Test for overall effect: Z = 10.07 (P < 0.00001)                                                     |              |      |       |         |      |       |                 |                   |                                      |                               |
| Total (95% CI)                                                                                       |              |      | 130   |         |      | 100   | 100.0%          | 4.00 [3.48, 4.52] |                                      |                               |
| Heterogeneity: Chi <sup>2</sup> = 16.20, df = 2 (P = 0.0003); I <sup>2</sup> = 88%                   |              |      |       |         |      |       |                 |                   |                                      |                               |
| Test for overall effect: Z = 15.04 (P < 0.00001)                                                     |              |      |       |         |      |       |                 |                   |                                      |                               |
| Test for subgroup differences: Chi <sup>2</sup> = 16.20, df = 2 (P = 0.0003), I <sup>2</sup> = 87.7% |              |      |       |         |      |       |                 |                   |                                      |                               |

Electro-acupuncture, fire needling, or warm needling vs. acupuncture

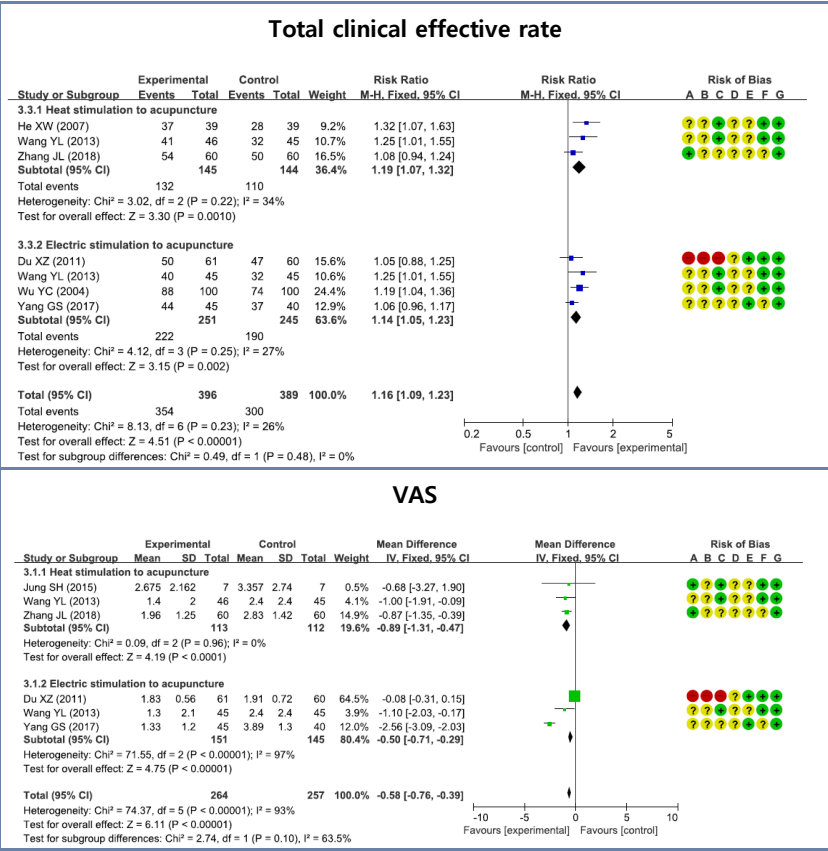

# ODI

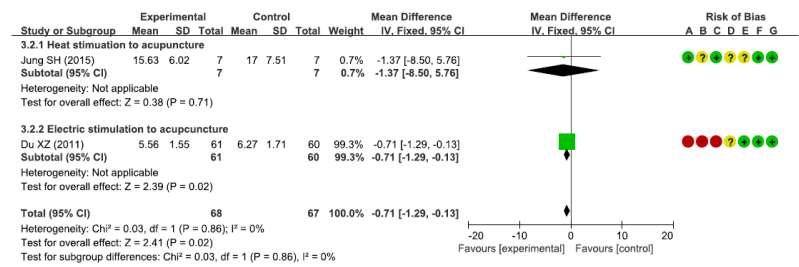

Deep insertion acupuncture vs. superficial insertion acupuncture

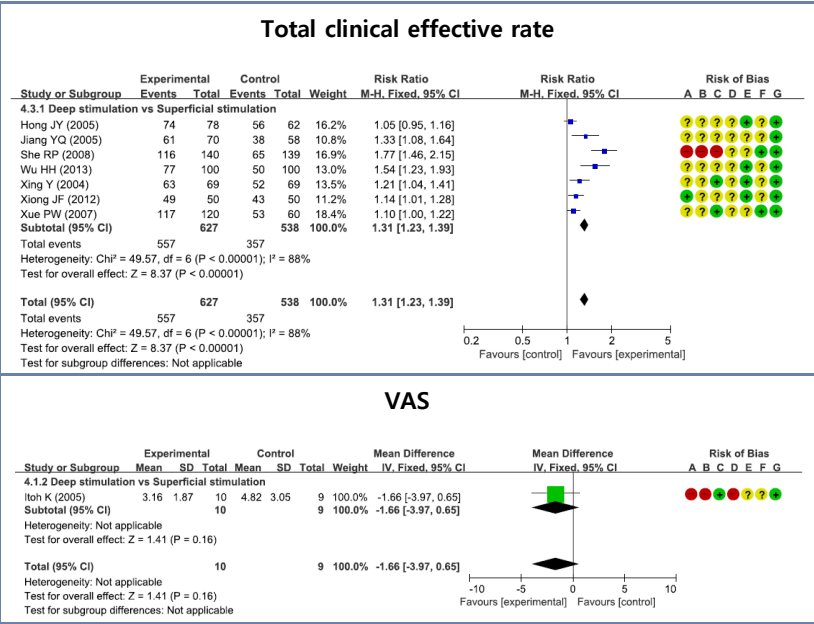

Moxibustion vs. active control group

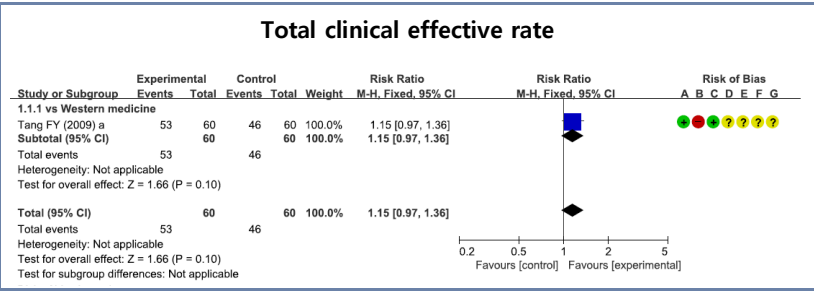



Moxibustion + usual conventional therapy vs. usual conventional therapy

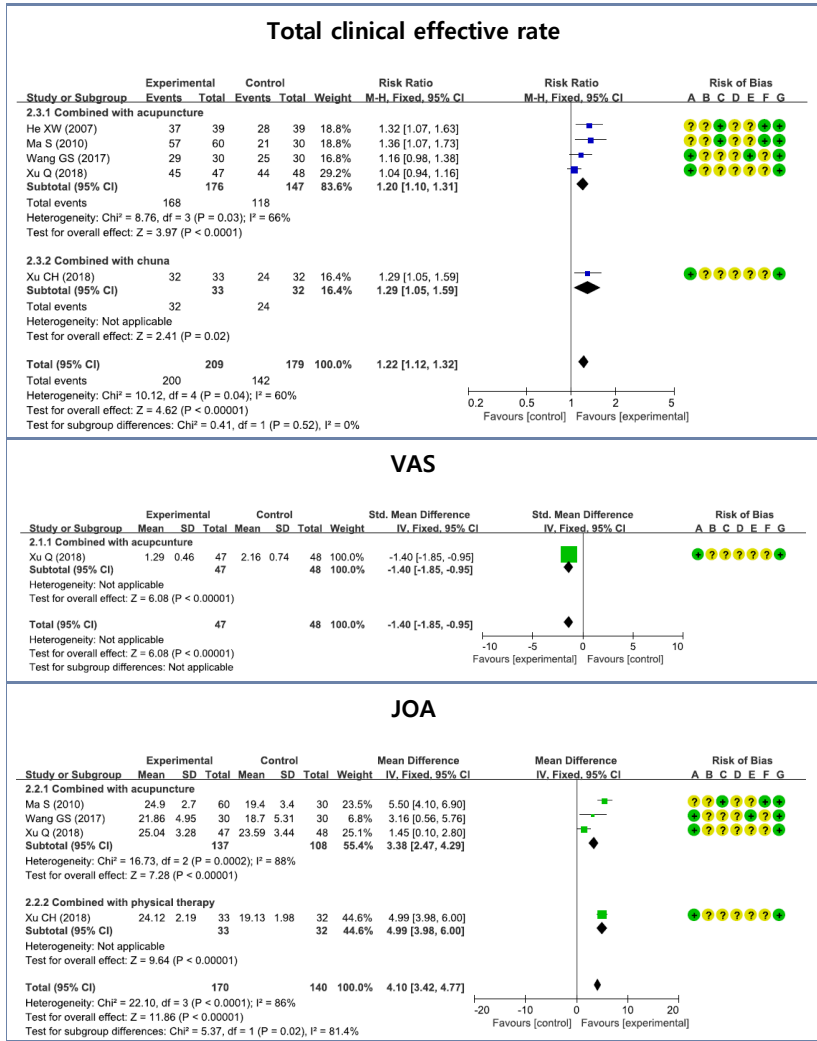

Moxibustion causing deqi sensation vs. moxibustion not causing deqi sensation

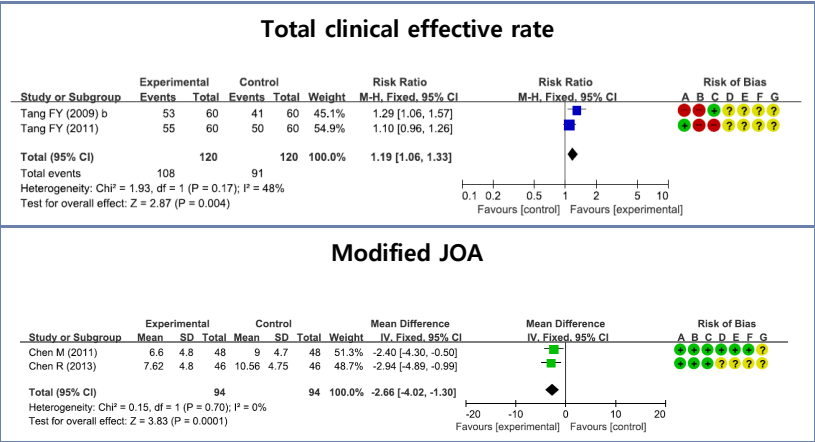

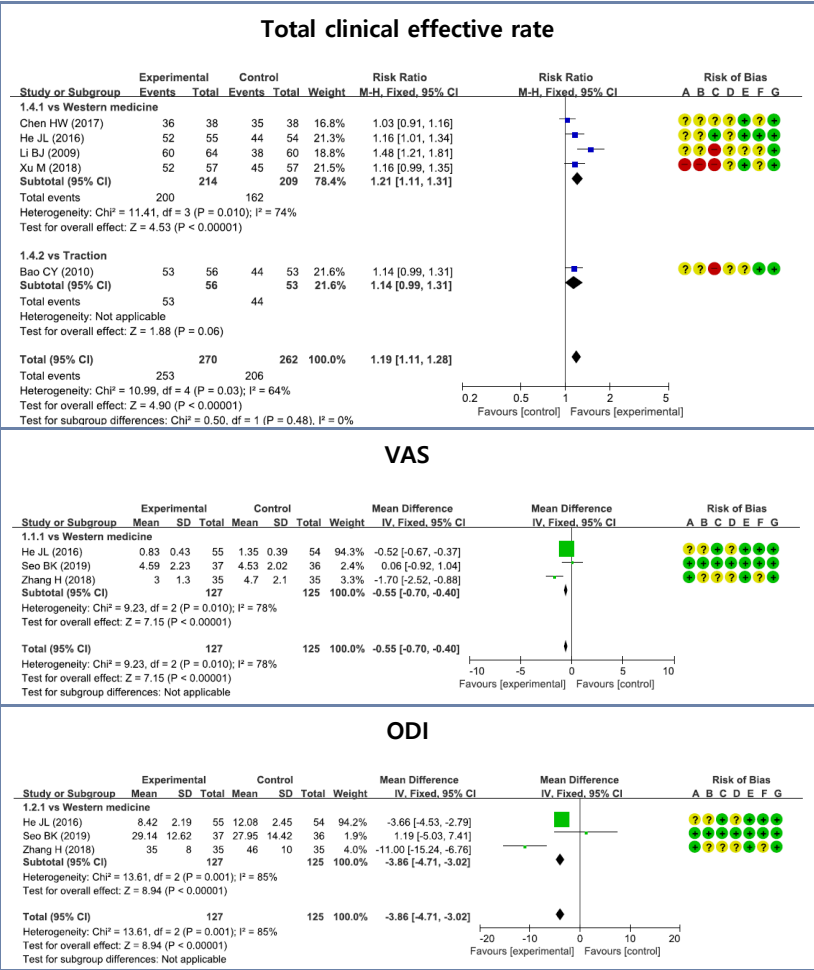

JOA

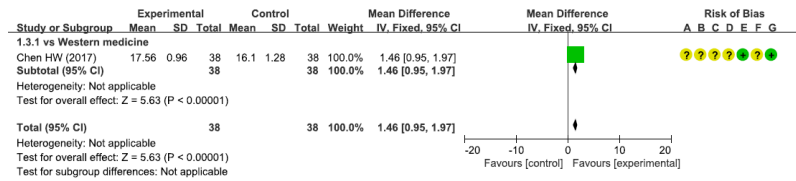

Herbal medicine + usual conventional therapy vs. usual conventional therapy

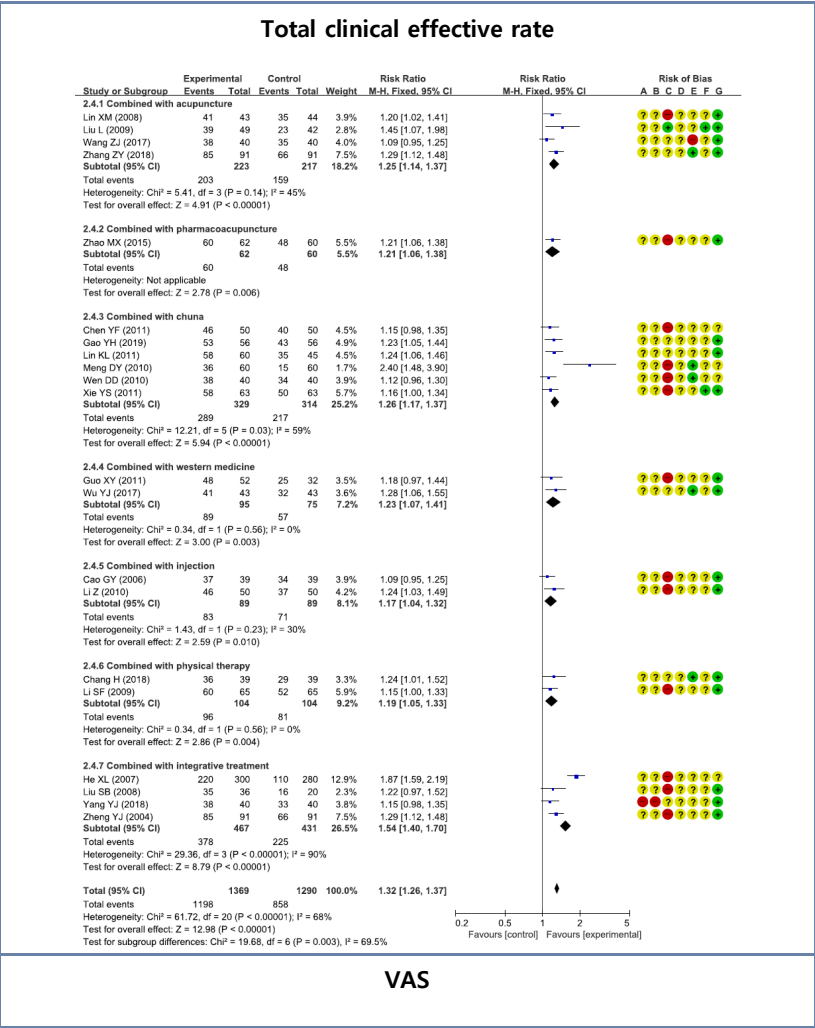

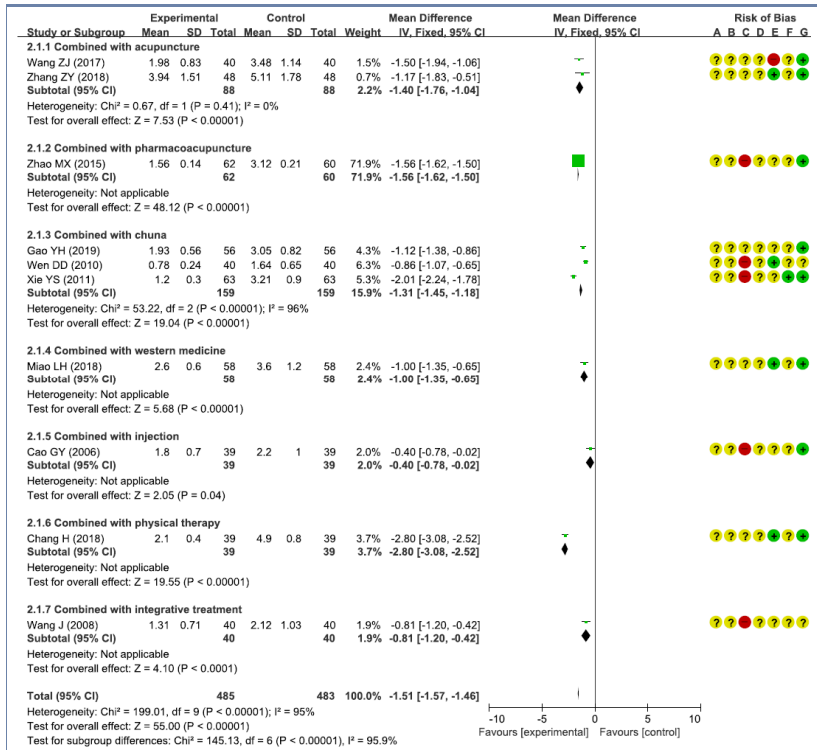

## ODI

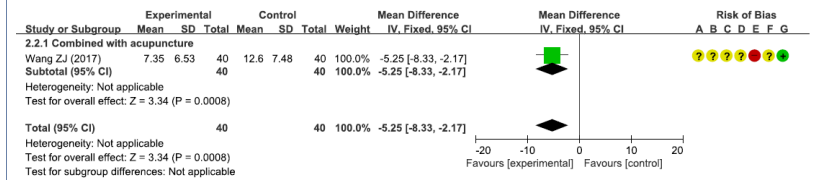

JOA

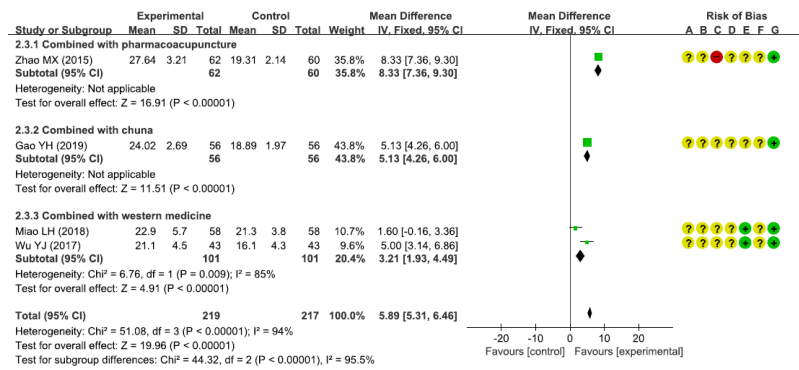

## Pharmacopuncture + usual conventional therapy vs. usual conventional therapy

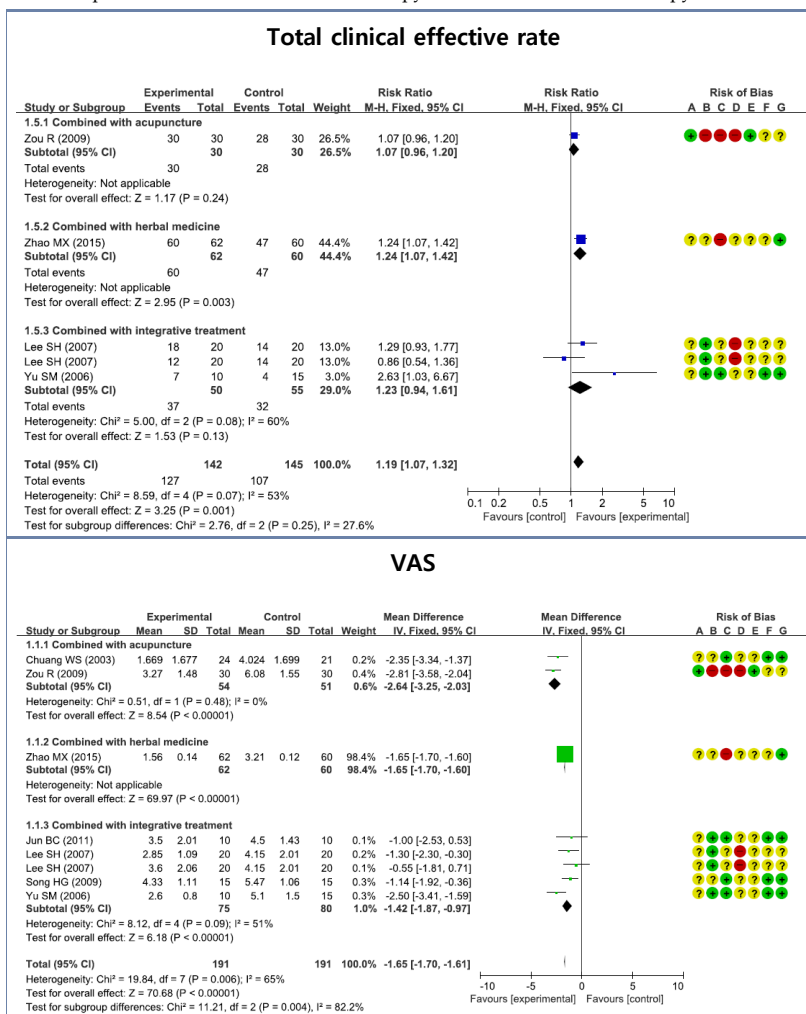



ODI

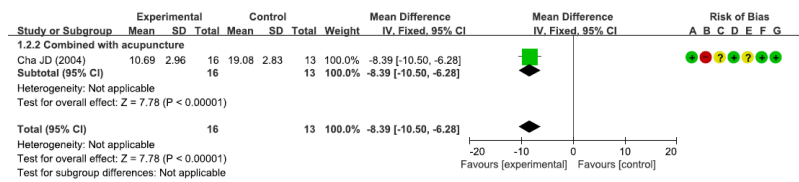

ODI change

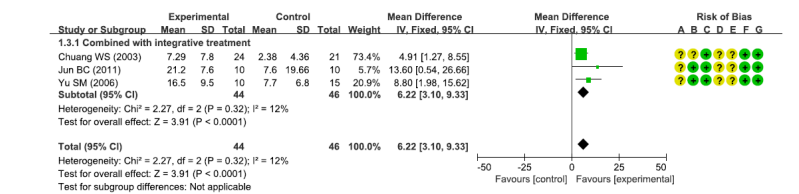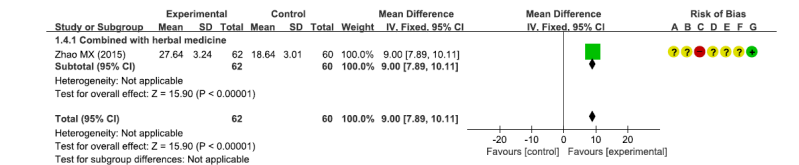

JOA

Tuina manual therapy vs active control treatment

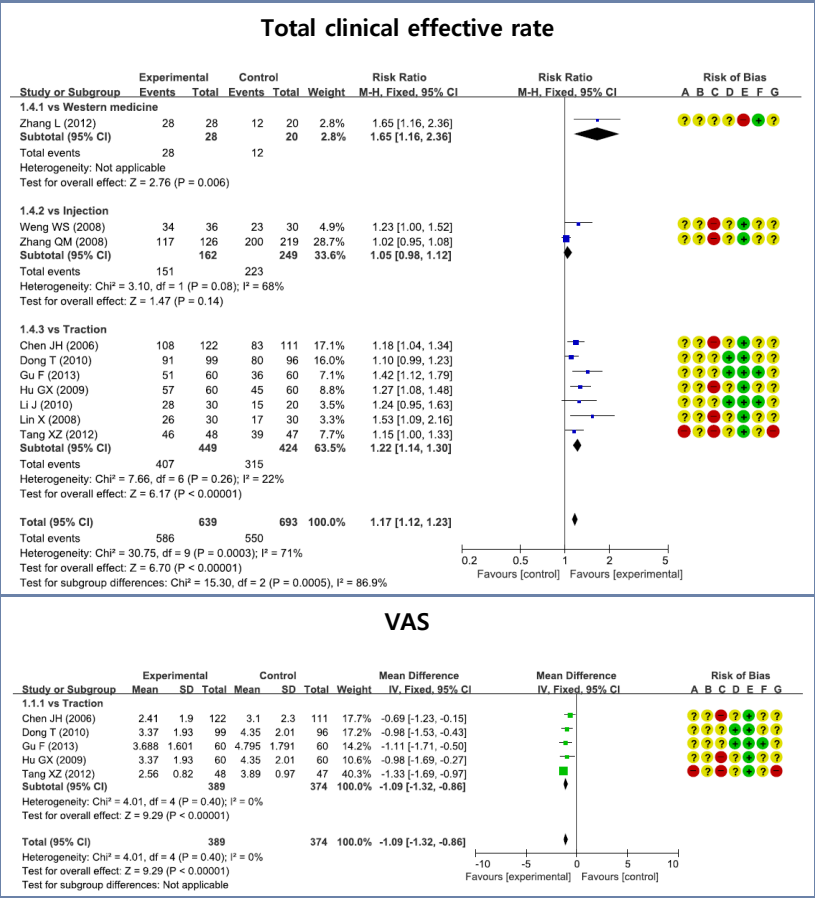

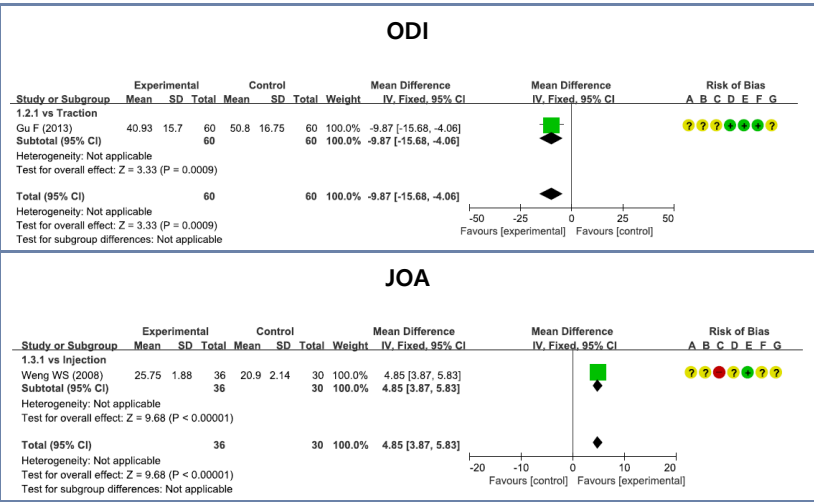

Tuina manual therapy + usual conventional therapy vs. usual conventional therapy

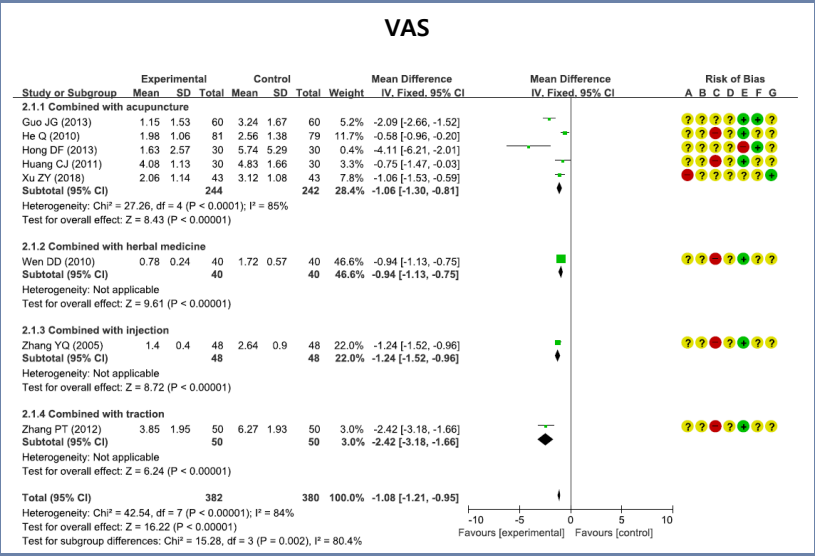

## Total clinical effective rate

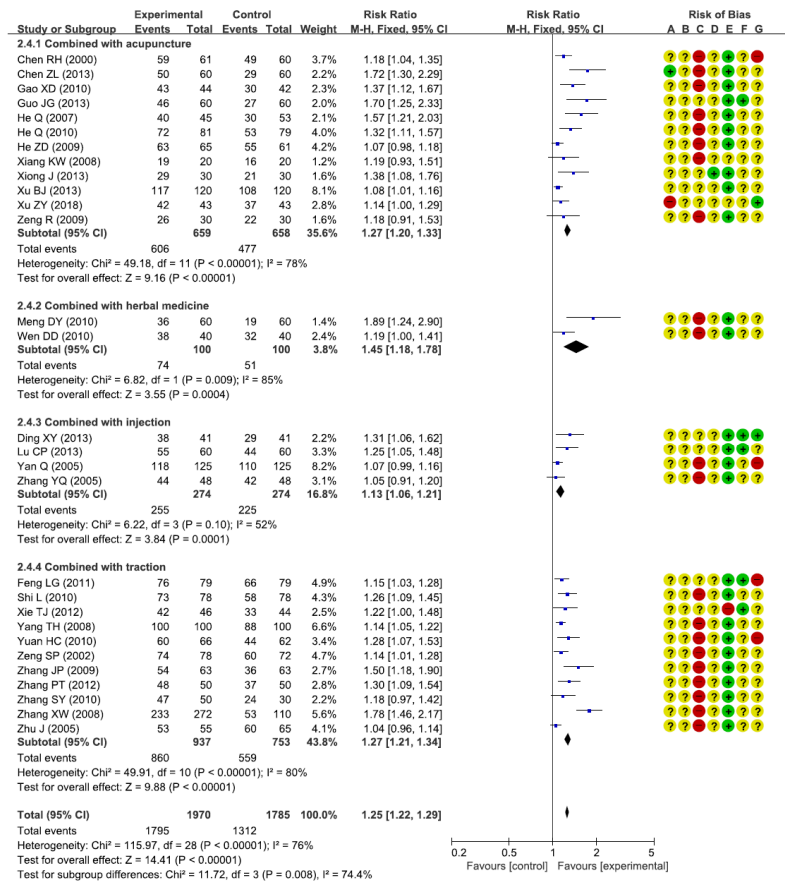

## ODI

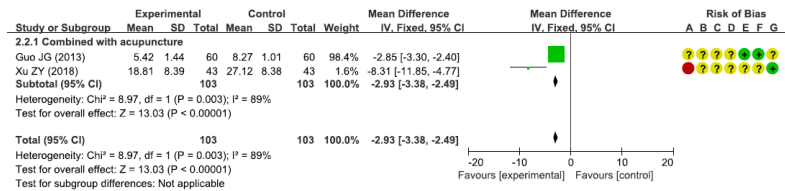

JOA

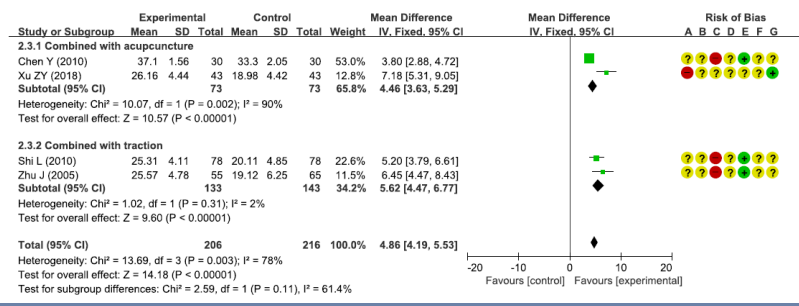

TEA vs. active control treatment

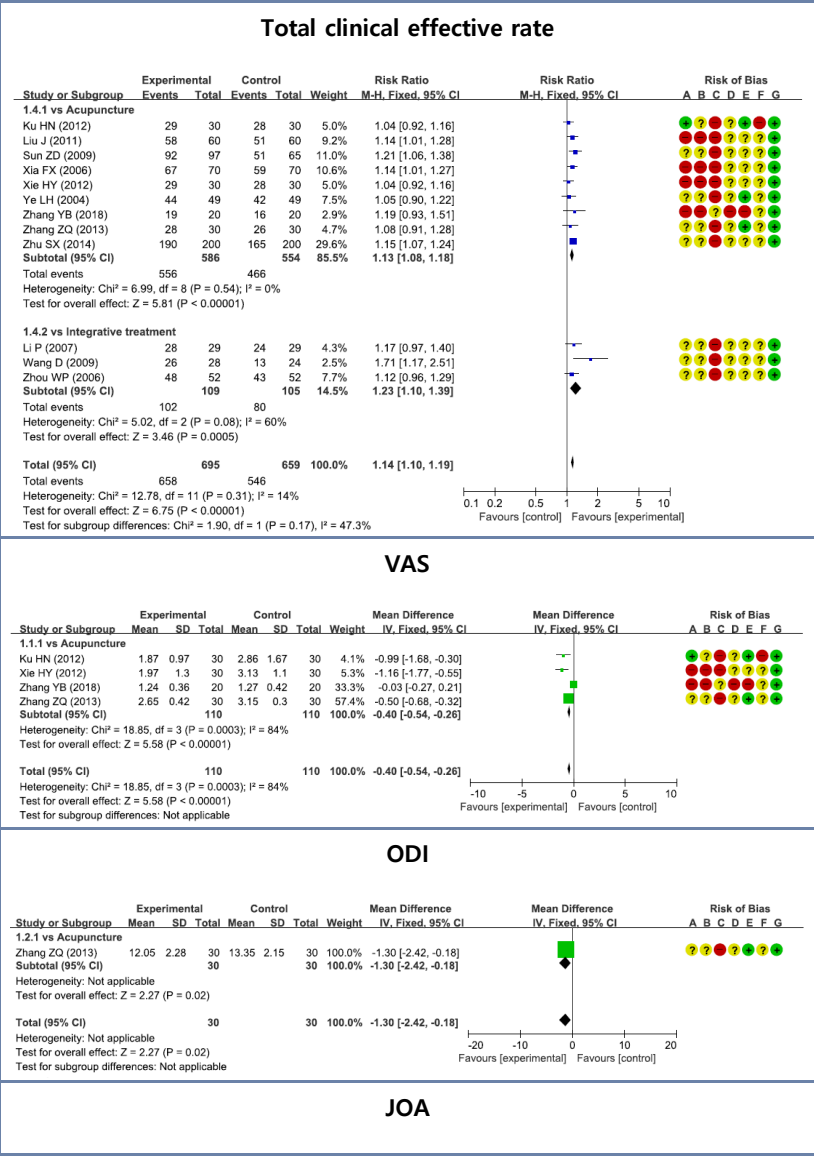

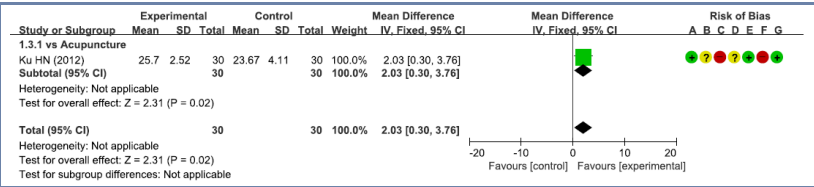



TEA + usual conventional therapy vs. usual conventional therapy

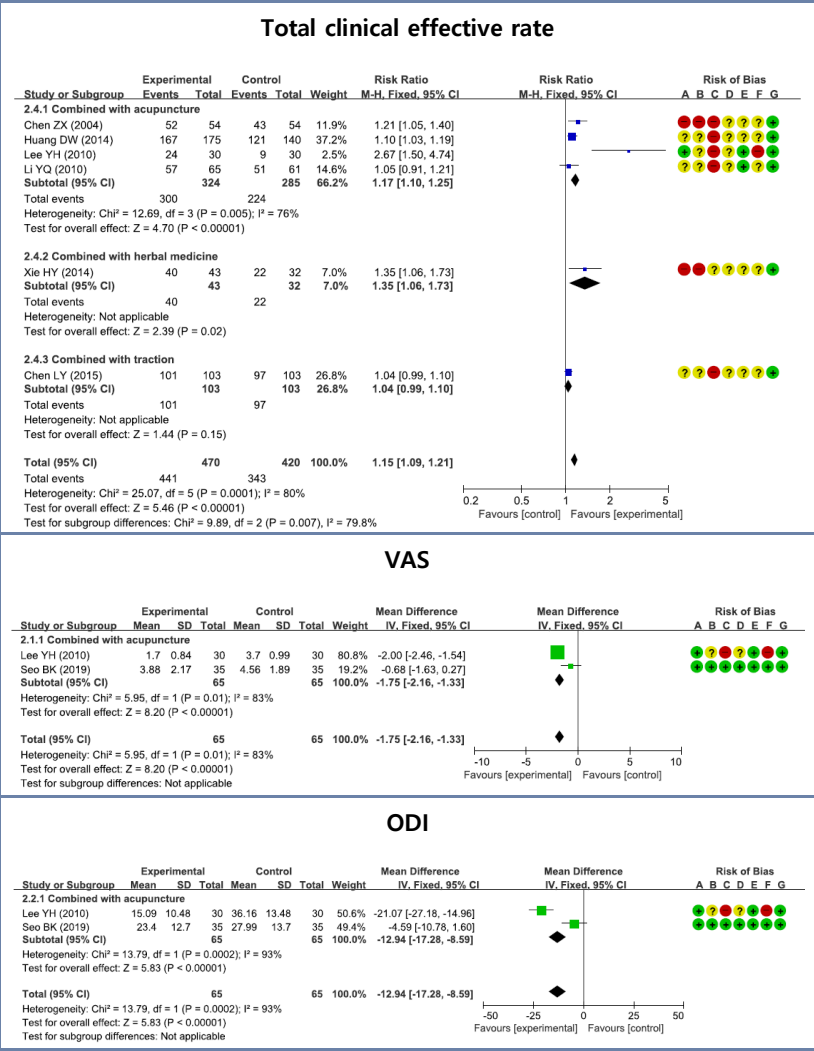

JOA

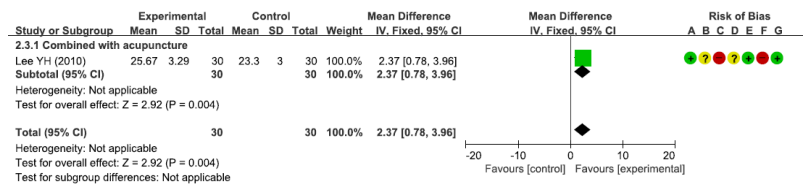

Cupping + usual conventional therapy vs. usual conventional therapy

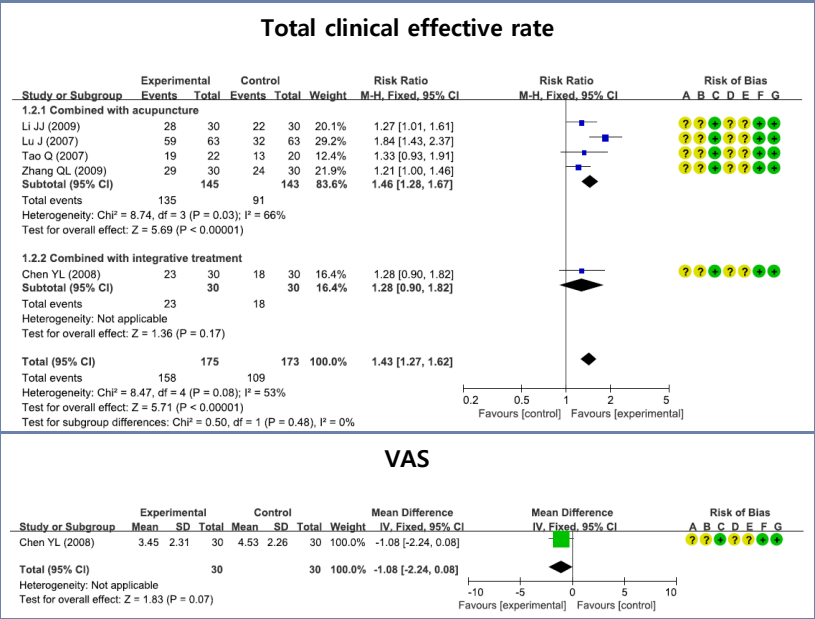

Supplement: s1 [file s1]
