# Supplementary material for: Korean Medicine Clinical Practice Guidelines for Lumbar Herniated Intervertebral Disc in Adults: Based on Grading of Recommendations Assessment, Development and Evaluation (GRADE)
Source: MDPI journal article supplement (doi:10.3390/healthcare10020246), 2022-01-27
Supplement: s1 [file s1]

## Supplementary S3

### Details of Recommendation

| Recommendation number       | Recommendation content                                                                                                                                                                                                                                                                                                                                                                                                                              | Recommendation level / evidence Level |
|-----------------------------|-----------------------------------------------------------------------------------------------------------------------------------------------------------------------------------------------------------------------------------------------------------------------------------------------------------------------------------------------------------------------------------------------------------------------------------------------------|---------------------------------------|
| 1) Acupuncture              |                                                                                                                                                                                                                                                                                                                                                                                                                                                     |                                       |
| Acupuncture alone treatment |                                                                                                                                                                                                                                                                                                                                                                                                                                                     |                                       |
| R1                          | Acupuncture alone treatment is recommended for improving overall symptoms of the lumbar herniated intervertebral disc in adult                                                                                                                                                                                                                                                                                                                      | A / High                              |
|                             | Clinical considerations<br>EX-B2 and acupoints of Governor Vessel(GV) and Bladder Meridian(BL) at the lumbar region may be primarily considered, and acupoints of BL and Gallbladder Meridian (GB) at the hip and lower extremities may be considered additionally depending on the location of the radiation pain.<br><br>The retention time of acupuncture or stimulation time of electro-acupuncture is generally appropriate for 20-30 minutes. |                                       |
| Combination treatment       |                                                                                                                                                                                                                                                                                                                                                                                                                                                     |                                       |
| R2                          | A combination of acupuncture with usual care is recommended for improving overall symptoms of the lumbar herniated intervertebral disc in adults                                                                                                                                                                                                                                                                                                    | A / Moderate                          |
|                             | Clinical considerations<br>A combination of acupuncture with Korean medical treatment such as moxibustion, herbal medicine, or chuna or Western medical treatment such as oral medication or injection may be considered to improve the effectiveness.                                                                                                                                                                                              |                                       |
| Treatment method            |                                                                                                                                                                                                                                                                                                                                                                                                                                                     |                                       |

|                             |                                                                                                                                                                                                                                      |                |
|-----------------------------|--------------------------------------------------------------------------------------------------------------------------------------------------------------------------------------------------------------------------------------|----------------|
| R3                          | Additional heat or electric stimulation on acupuncture is recommended for improving overall symptoms of the lumbar herniated intervertebral disc in adults                                                                           | A / High       |
| R4                          | Deep insertion acupuncture technique should be considered for improving overall symptoms of the lumbar herniated intervertebral disc in adults                                                                                       | B / Moderate   |
|                             | Clinical considerations<br>Deep insertion acupuncture technique is mainly applicable to EX-B2, and an acupuncture needle may be inserted to a depth of 45-90mm or bone-contact depth depending on the patient's physique for safety. |                |
| 2) Moxibustion              |                                                                                                                                                                                                                                      |                |
| Moxibustion alone treatment |                                                                                                                                                                                                                                      |                |
| R5                          | Based on the expert group consensus, moxibustion alone treatment is recommended for improving overall symptoms of the lumbar herniated intervertebral disc in adult                                                                  | GPP / Very low |
| Combination treatment       |                                                                                                                                                                                                                                      |                |
| R6                          | A combination of moxibustion with acupuncture or chuna is recommended for improving overall symptoms of the lumbar herniated intervertebral disc in adults                                                                           | A / High       |
|                             | Clinical considerations<br>BL23, GB30, BL40, BL25 and ashi points can be considered when selecting acupoints for moxibustion.                                                                                                        |                |
| Treatment method            |                                                                                                                                                                                                                                      |                |
| R7                          | Moxibustion that elicits Deqi sensation may be considered for improving overall symptoms of                                                                                                                                          | C / Low        |

|                                 |                                                                                                                                                                                                                                                                                                                                                                                                                                               |              |
|---------------------------------|-----------------------------------------------------------------------------------------------------------------------------------------------------------------------------------------------------------------------------------------------------------------------------------------------------------------------------------------------------------------------------------------------------------------------------------------------|--------------|
|                                 | the lumbar herniated intervertebral disc in adults                                                                                                                                                                                                                                                                                                                                                                                            |              |
| 3) Herbal medicine              |                                                                                                                                                                                                                                                                                                                                                                                                                                               |              |
| Herbal medicine alone treatment |                                                                                                                                                                                                                                                                                                                                                                                                                                               |              |
| R8                              | Herbal medicine alone treatment should be considered for improving overall symptoms of the lumbar herniated intervertebral disc in adult                                                                                                                                                                                                                                                                                                      | B / Moderate |
|                                 | Clinical considerations<br>Dokwhalgisaeng-tang which can be modified by pattern identification may be prescribed in herbal medicine alone treatment for the lumbar herniated intervertebral disc.                                                                                                                                                                                                                                             |              |
| Combination treatment           |                                                                                                                                                                                                                                                                                                                                                                                                                                               |              |
| R9                              | A combination of herbal medicine with usual care is recommended for improving overall symptoms of the lumbar herniated intervertebral disc in adults                                                                                                                                                                                                                                                                                          | A / High     |
|                                 | Clinical considerations<br>A combination of herbal medicine with Korean medical treatment such as acupuncture, pharmacopuncture, or chuna, or western medical treatment such as oral medications or injection may be considered to improve the effectiveness.<br>Dokwhalgisaeng-tang which can be modified by pattern identification may be prescribed in herbal medicine combination treatment for the lumbar herniated intervertebral disc. |              |
| 4) Pharmacopuncture             |                                                                                                                                                                                                                                                                                                                                                                                                                                               |              |
| Combination treatment           |                                                                                                                                                                                                                                                                                                                                                                                                                                               |              |
| R10                             | A combination of pharmacopuncture with usual care should be considered for improving overall                                                                                                                                                                                                                                                                                                                                                  | B / Moderate |

|                                              |                                                                                                                                                                                                                                                                                                                                                                                                                                                                                                                                                                 |                     |
|----------------------------------------------|-----------------------------------------------------------------------------------------------------------------------------------------------------------------------------------------------------------------------------------------------------------------------------------------------------------------------------------------------------------------------------------------------------------------------------------------------------------------------------------------------------------------------------------------------------------------|---------------------|
|                                              | <b>symptoms of the lumbar herniated<br/>intervertebral disc in adults</b>                                                                                                                                                                                                                                                                                                                                                                                                                                                                                       |                     |
|                                              | <b>Clinical considerations</b><br>A combination of pharmacopuncture with acupuncture, chuna or integrative Korean medical treatment may be considered to improve the effectiveness.<br><br>Bee venom Pharmacopuncture may be considered when selecting pharmacopuncture for the lumbar herniated intervertebral disc, and the dose or concentration of bee venom should be gradually increased after confirming a patient’s adverse reaction.<br><br>EX-B2, acupoints of Governor Vessel(GV), and ashi points may be considered for pharmacopuncture treatment. |                     |
| 5) Chuna                                     |                                                                                                                                                                                                                                                                                                                                                                                                                                                                                                                                                                 |                     |
| Chuna alone treatment                        |                                                                                                                                                                                                                                                                                                                                                                                                                                                                                                                                                                 |                     |
| R11                                          | <b>Chuna alone treatment is recommended for<br/>improving overall symptoms of the lumbar<br/>herniated intervertebral disc in adult</b>                                                                                                                                                                                                                                                                                                                                                                                                                         | <b>A / High</b>     |
| Combination treatment                        |                                                                                                                                                                                                                                                                                                                                                                                                                                                                                                                                                                 |                     |
| R12                                          | <b>A combination of chuna with usual care is<br/>recommended for improving overall symptoms<br/>of the lumbar herniated intervertebral disc in<br/>adults</b>                                                                                                                                                                                                                                                                                                                                                                                                   | <b>A / Moderate</b> |
|                                              | <b>Clinical considerations</b><br>A combination of chuna with Korean medical treatment such as acupuncture, herbal medicine, or traction, or western medical treatment such as injection may be considered to improve the effectiveness.                                                                                                                                                                                                                                                                                                                        |                     |
| 6) Thread-embedding acupuncture              |                                                                                                                                                                                                                                                                                                                                                                                                                                                                                                                                                                 |                     |
| Thread-embedding acupuncture alone treatment |                                                                                                                                                                                                                                                                                                                                                                                                                                                                                                                                                                 |                     |
| R13                                          | <b>Thread-embedding acupuncture should be</b>                                                                                                                                                                                                                                                                                                                                                                                                                                                                                                                   | <b>B / Moderate</b> |

|                       |                                                                                                                                                                                                                                                                                                                                                                                                                                                          |              |
|-----------------------|----------------------------------------------------------------------------------------------------------------------------------------------------------------------------------------------------------------------------------------------------------------------------------------------------------------------------------------------------------------------------------------------------------------------------------------------------------|--------------|
|                       | considered for improving overall symptoms of the lumbar herniated intervertebral disc in adult                                                                                                                                                                                                                                                                                                                                                           |              |
|                       | <b>Clinical considerations</b><br>EX-B2, acupoints of Governor Vessel (GV) and Bladder Meridian (BL), and ashi points at the lumbar region may be primarily considered, and acupoints of BL and Gallbladder Meridian (GB) at the hip and lower extremities may be considered additionally depending on the location of the radiation pain.<br><br>When repeating thread-embedding acupuncture treatment, it may be considered at intervals of 1-2 weeks. |              |
| Combination treatment |                                                                                                                                                                                                                                                                                                                                                                                                                                                          |              |
| R14                   | A combination of thread-embedding acupuncture with usual care should be considered for improving overall symptoms of the lumbar herniated intervertebral disc in adults                                                                                                                                                                                                                                                                                  | B / Moderate |
|                       | <b>Clinical considerations</b><br>A combination of thread-embedding acupuncture with electro-acupuncture on the same or similar acupoints may be considered to improve the effectiveness.                                                                                                                                                                                                                                                                |              |
| 7) Cupping treatment  |                                                                                                                                                                                                                                                                                                                                                                                                                                                          |              |
| Combination treatment |                                                                                                                                                                                                                                                                                                                                                                                                                                                          |              |
| R15                   | A combination of cupping treatment with usual care should be considered for improving overall symptoms of the lumbar herniated intervertebral disc in adults                                                                                                                                                                                                                                                                                             | B / Moderate |
|                       | <b>Clinical considerations</b><br>Wet cupping technique may be considered for the treatment of the lumbar herniated intervertebral disc, and it may be combined with                                                                                                                                                                                                                                                                                     |              |

|  |                                           |
|--|-------------------------------------------|
|  | acupuncture to improve the effectiveness. |
|--|-------------------------------------------|

### Diagnostic algorithm

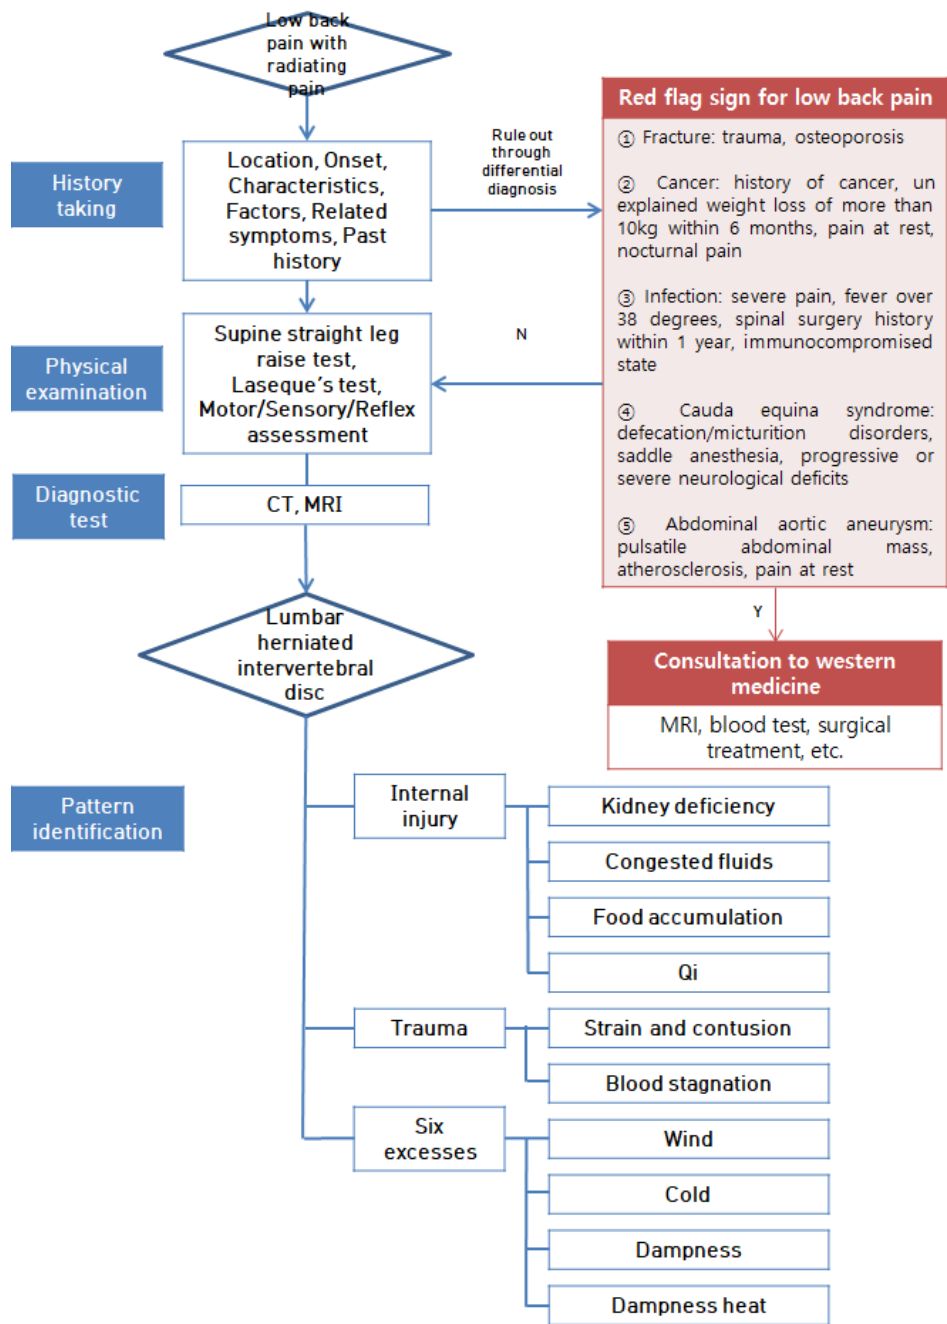

### Treatment algorithm

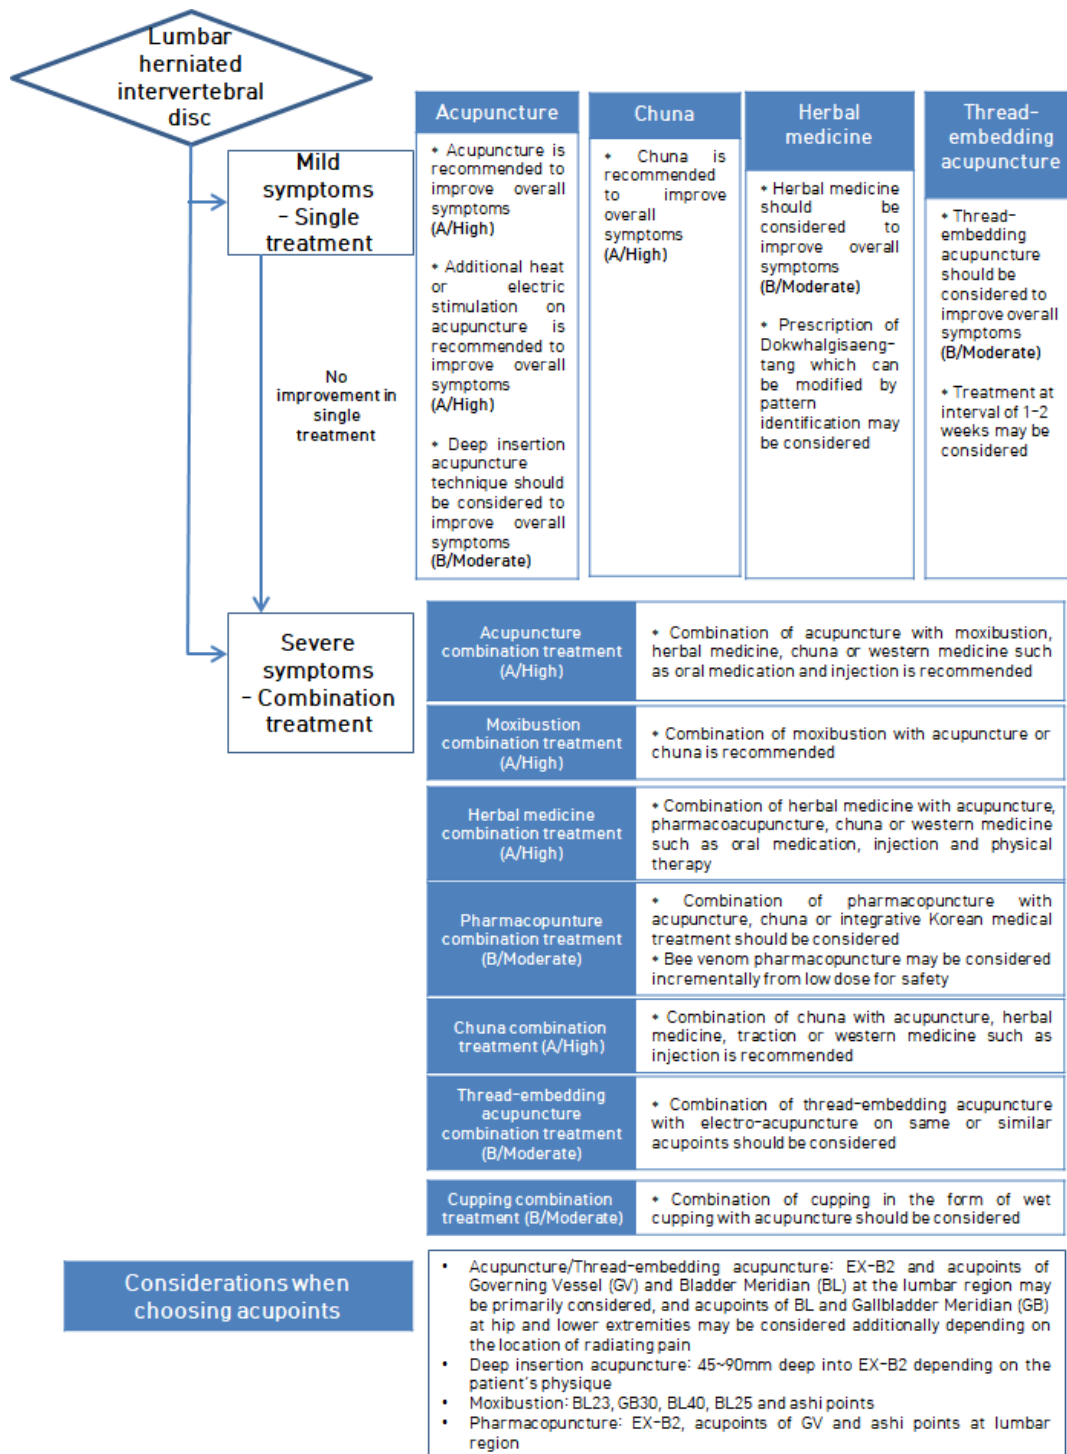

## Details of Clinical Findings

| Outcome measures                                               | Numbar of patients            |                         | Effect                               |                                                           | Comments                                        |
|----------------------------------------------------------------|-------------------------------|-------------------------|--------------------------------------|-----------------------------------------------------------|-------------------------------------------------|
|                                                                | Intervention<br>group (n)     | Comparison<br>group (n) | Relative effect<br>(95% CI, p value) | Number of<br>total patients<br><br>(Number of<br>studies) |                                                 |
| Acupuncture                                                    |                               |                         |                                      |                                                           |                                                 |
| CQ1.<br>Total clinical effective<br>rate (23, RCTs) [12-35]    | Acupuncture<br>(1,294)        | UCT<br>(1,149)          | RR 1.18<br>(1.12,1.25, p<0.00001)    | 2,443<br>(23)                                             | The higher score,<br>the more effect            |
| Pain (15, RCTs) [12-26]                                        | Acupuncture<br>(684)          | UCT<br>(605)            | MD -1.86<br>(-1.91,-1.81, p<0.00001) | 1,289<br>(15)                                             | The lower score,<br>the lower pain<br>intensity |
| Function (JOA) (4, RCTs)<br>[13,14,16,33]                      | Acupuncture<br>(144)          | UCT<br>(133)            | MD 4.48<br>(3.39, 5.03, p<0.00001)   | 277<br>(4)                                                | The higher score,<br>the more<br>improvement    |
| CQ2.<br>Total clinical effective<br>rate (13, RCTs)[20, 36-44] | Acupuncture +<br>UCT<br>(693) | UCT<br>(632)            | RR 1.21<br>(1.16, 1.28, p<0.00001)   | 1,326<br>(13)                                             | The higher score,<br>the more effect            |



|                                                                |                                                                          |                      |                                       |            |                                                 |
|----------------------------------------------------------------|--------------------------------------------------------------------------|----------------------|---------------------------------------|------------|-------------------------------------------------|
| Pain (5, RCTs)[36, 42-45]                                      | Acupuncture +<br>UCT<br>(212)                                            | UCT<br>(212)         | MD -1.03<br>(-1.16,-0.90, p<0.00001)  | 424<br>(5) | The lower score,<br>the lower pain<br>intensity |
| Function (ODI) (2, RCTs)<br>[36, 43]                           | Acupuncture +<br>UCT<br>(90)                                             | UCT<br>(90)          | MD -3.27<br>(-3.86, -2.68, p<0.00001) | 180<br>(2) | The lower score,<br>the more<br>improvement     |
| Function (JOA) (3, RCTs)<br>[44,46,47]                         | Acupuncture +<br>UCT<br>(130)                                            | UCT<br>(100)         | MD 4.00<br>(3.48, 4.52, p<0.00001)    | 200<br>(3) | The higher score,<br>the more<br>improvement    |
| CQ3.<br>Total clinical effective<br>rate (7, RCTs) [22, 53-57] | Electric<br>acupuncture or<br>fire needling or<br>warm needling<br>(396) | Acupuncture<br>(389) | RR 1.16<br>(1.09, 1.23, p<0.00001)    | 785<br>(7) | The higher score,<br>the more effect            |
| Pain (6, RCTs) [52-56]                                         | Electric<br>acupuncture or<br>fire needling or<br>warm needling<br>(264) | Acupuncture<br>(257) | MD -0.58<br>(-0.76,-0.39, p<0.00001)  | 521<br>(6) | The lower score,<br>the lower pain<br>intensity |
| Function (ODI) (2, RCTs)<br>[52, 55]                           | Electric<br>acupuncture or                                               | Acupuncture<br>(67)  | MD -0.71<br>(-1.29,-0.13, p=0.02)     | 135<br>(2) | The lower score,<br>the more                    |

|                                                                        |                                                                                      |                                                    |                                    |              |                                                 |
|------------------------------------------------------------------------|--------------------------------------------------------------------------------------|----------------------------------------------------|------------------------------------|--------------|-------------------------------------------------|
|                                                                        | fire needling or<br>warm needling<br>(68)                                            |                                                    |                                    |              | improvement                                     |
| CQ4.<br>Total clinical effective<br>rate (7, RCTs) [59-65]             | Deep-injection<br>acupuncture<br>(627)                                               | Superficial-<br>injection<br>acupuncture<br>(538)  | RR 1.31<br>(1.23, 1.39, p<0.00001) | 1,165<br>(7) | The higher score,<br>the more effect            |
| Pain (1, RCTs) [58]                                                    | Deep-injection<br>acupuncture<br>(10)                                                | Superficial-<br>injection<br>acupuncture<br>(9)    | MD -1.66<br>(-3.97,0.65, p=0.16)   | 19<br>(1)    | The lower score,<br>the lower pain<br>intensity |
| <b>Moxibustion</b>                                                     |                                                                                      |                                                    |                                    |              |                                                 |
| CQ5.<br>Total clinical effective<br>rate (1, RCTs) [66]                | Moxibustion<br>(60)                                                                  | UCT<br>(60)                                        | RR 1.15<br>(0.97, 1.36, P=0.10)    | 120<br>(1)   | The higher score,<br>the more effect            |
| CQ6.<br>Total clinical effective<br>rate (5, RCTs) [47, 57, 69-<br>71] | Moxibustion +<br>acupuncture or<br>Moxibustion +<br>Chuna manual<br>therapy<br>(209) | Acupuncture or<br>Chuna manual<br>therapy<br>(179) | RR 1.22<br>(1.12, 1.32, P=0.04)    | 388<br>(5)   | The higher score,<br>the more effect            |

|                                                            |                                                                                      |                                                    |                                       |             |                                                 |
|------------------------------------------------------------|--------------------------------------------------------------------------------------|----------------------------------------------------|---------------------------------------|-------------|-------------------------------------------------|
| Pain (1, RCTs) [69]                                        | Moxibustion +<br>acupuncture or<br>Moxibustion +<br>Chuna manual<br>therapy<br>(47)  | Acupuncture or<br>Chuna manual<br>therapy<br>(48)  | MD -1.40<br>(-1.85,-0.95, p<0.00001)  | 95<br>(1)   | The lower score,<br>the lower pain<br>intensity |
| Function (JOA) (4, RCTs)<br>[47, 69-71]                    | Moxibustion +<br>acupuncture or<br>Moxibustion +<br>Chuna manual<br>therapy<br>(170) | Acupuncture or<br>Chuna manual<br>therapy<br>(140) | MD 4.10<br>(3.42, 4.77, p<0.00001)    | 310<br>(4)  | The higher score,<br>the more<br>improvement    |
| CQ7.<br>Total clinical effective<br>rate (2, RCTs) [74,75] | Moxibustion with<br>deqi sensation<br>(120)                                          | Moxibustion<br>without deqi<br>sensation<br>(120)  | RR 1.19<br>(1.06, 1.33, P=0.004)      | 240<br>(2)  | The higher score,<br>the more effect            |
| Function (m-JOA)<br>(2, RCTs) [72,73]                      | Moxibustion with<br>deqi sensation<br>(94)                                           | Moxibustion<br>without deqi<br>sensation<br>(94)   | MD -2.66<br>(-4.02,- 1.30, p<0.00001) | 188<br>(2)) | The lower score,<br>the more<br>improvement     |
| <b>Herbal medicine</b>                                     |                                                                                      |                                                    |                                       |             |                                                 |
| CQ8.                                                       | Herbal medicine                                                                      | UCT                                                | RR 1.19                               | 532         | The higher score,                               |

|                                                                            |                              |            |                                      |               |                                              |
|----------------------------------------------------------------------------|------------------------------|------------|--------------------------------------|---------------|----------------------------------------------|
| Total clinical effective rate (5, RCTs) [76, 79-82]                        | (270)                        | (262)      | (1.11, 1.28, p<0.00001)              | (5)           | the more effect                              |
| Pain (3, RCTs) [76-78]                                                     | Herbal medicine (127)y       | UCT (125)  | MD -0.55<br>(-0.70,-0.40, p<0.00001) | 252<br>(3)    | The lower score,<br>the lower pain intensity |
| Function (ODI) (3, RCTs) [76-78]                                           | Herbal medicine (127)        | UCT (125)  | MD -3.86<br>(-4.71,-3.02, p<0.00001) | 252<br>(3)    | The lower score,<br>the more improvement     |
| Function (JOA) (1, RCTs) [79]                                              | Herbal medicine (38)         | UCT (38)   | MD 1.46<br>(0.95,1.97, p<0.00001)    | 76<br>(1)     | The higher score,<br>the more improvement    |
| CQ9.<br>Total clinical effective rate (21, RCTs) [40,41,83,85-100,102-103] | Herbal medicine + UCT (1369) | UCT (1290) | RR 1.32<br>(1.26, 1.37, p<0.00001)   | 2,659<br>(21) | The higher score,<br>the more effect         |
| Pain (10, RCTs) [83,84,94,97-103]                                          | Herbal medicine + UCT (485)  | UCT (483)  | MD -1.51<br>(-1.57,-1.46, p<0.00001) | 968<br>(10)   | The lower score,<br>the lower pain intensity |
| Function (ODI) (1, RCTs) [83]                                              | Herbal medicine + UCT (40)   | UCT (40)   | MD -5.25<br>(-8.33,-2.17, p=0.0008)  | 80<br>(1)     | The lower score,<br>the more improvement     |

|                                                                     |     |                                 |              |                                      |            |                                              |
|---------------------------------------------------------------------|-----|---------------------------------|--------------|--------------------------------------|------------|----------------------------------------------|
| Function (JOA) RCTs)[85,97,98,101]                                  | (4, | Herbal medicine + UCT<br>(219)  | UCT<br>(217) | MD 5.89<br>(5.31,6.46, p<0.00001)    | 436<br>(4) | The higher score,<br>the more improvement    |
| <b>Pharmacopuncture</b>                                             |     |                                 |              |                                      |            |                                              |
| CQ10.<br>Total clinical effective rate (5, RCTs)[97, 105, 107, 109] |     | Pharmacopuncture + UCT<br>(142) | UCT<br>(145) | RR 1.19<br>(1.07, 1.32, P=0.001)     | 287<br>(5) | The higher score,<br>the more effect         |
| Pain (8, RCTs)[97, 104-109]                                         |     | Pharmacopuncture + UCT<br>(191) | UCT<br>(191) | MD -1.65<br>(-1.70,-1.61, p<0.00001) | 382<br>(8) | The lower score,<br>the lower pain intensity |
| Function (ODI) RCTs)[110]                                           | (1, | Pharmacopuncture + UCT<br>(16)  | UCT<br>(13)  | MD -8.39<br>(-10.50,-6.28,p<0.00001) | 29<br>(1)  | The lower score,<br>the more improvement     |
| Function (ODIc) RCTs) [104, 106, 109]                               | (3, | Pharmacopuncture + UCT<br>(44)  | UCT<br>(46)  | MD 6.22<br>(3.10,9.33, p<0.0001)     | 90<br>(3)  | The higher score,<br>the more improvement    |

|                                                                              |                             |                   |                                   |            |                                           |
|------------------------------------------------------------------------------|-----------------------------|-------------------|-----------------------------------|------------|-------------------------------------------|
| Function (JOA) (1, RCTs) [97]                                                | Pharmacopuncture + UCT (62) | UCT (60)          | MD 9.00 (7.89,10.11, p<0.00001)   | 122 (1)    | The higher score, the more improvement    |
| <b>Chuna manual therapy</b>                                                  |                             |                   |                                   |            |                                           |
| CQ11. Total clinical effective rate (10, RCTs) [111-120]                     | Chuna therapy (639)         | manual UCT (693)  | RR 1.17 (1.12, 1.23, p<0.00001)   | 1,332 (10) | The higher score, the more effect         |
| Pain (5, RCTs) [111-115]                                                     | Chuna therapy (389)         | manual UCT (374)  | MD -1.09 (-1.32,-0.86, p<0.00001) | 763 (5)    | The lower score, the lower pain intensity |
| Function (ODI) (1, RCTs) [113]                                               | Chuna therapy (60)          | manual UCT (60)   | MD -9.87 (-15.68,-4.06, p=0.0009) | 120 (1)    | The lower score, the more improvement     |
| Function (JOA) (1, RCTs) [116]                                               | Chuna therapy (36)          | manual UCT (30)   | MD 4.85 (3.87,5.83, p<0.00001)    | 66 (1)     | The higher score, the more improvement    |
| CQ12. Total clinical effective rate (29, RCTs)[36, 39, 89, 99, 121, 124-147] | Chuna therapy + UCT (1970)  | manual UCT (1785) | RR 1.25 (1.22, 1.29, p<0.00001)   | 3,755 (29) | The higher score, the more effect         |

|                                                             |                                    |                  |                                      |               |                                              |
|-------------------------------------------------------------|------------------------------------|------------------|--------------------------------------|---------------|----------------------------------------------|
| Pain (8, RCTs) [36, 99, 121-126]                            | Chuna therapy + UCT (382)          | manual UCT (380) | MD -1.08<br>(-1.21,-0.95, p<0.00001) | 762<br>(8)    | The lower score,<br>the lower pain intensity |
| Function (ODI) (2, RCTs) [36, 124]                          | Chuna therapy + UCT (103)          | manual UCT (103) | MD -2.93<br>(-3.38,-2.49, p<0.00001) | 206<br>(2)    | The lower score,<br>the more improvement     |
| Function (JOA) (4, RCTs) [46, 124, 127, 128]                | Chuna therapy + UCT (206)          | manual UCT (216) | MD 4.86<br>(4.19,5.53, p<0.00001)    | 422<br>(4)    | The higher score,<br>the more improvement    |
| <b>Thread-embedding acupuncture</b>                         |                                    |                  |                                      |               |                                              |
| CQ13.<br>Total clinical effective rate (12, RCTs) [148-159] | Thread-embedding acupuncture (695) | UCT (659)        | RR 1.14<br>(1.10, 1.19, p<0.00001)   | 1,354<br>(12) | The higher score,<br>the more effect         |
| Pain (4, RCTs) [148-151]                                    | Thread-embedding acupuncture (110) | UCT (110)        | MD -0.40<br>(-0.54,-0.26, p<0.00001) | 220<br>(4)    | The lower score,<br>the lower pain intensity |
| Function (ODI) (1, RCTs) [151]                              | Thread-embedding acupuncture (30)  | UCT (30)         | MD -1.30<br>(-2.42,-0.18, p=0.02)    | 60<br>(1)     | The lower score,<br>the more improvement     |

|                                                              |                                           |            |                                    |         |                                           |
|--------------------------------------------------------------|-------------------------------------------|------------|------------------------------------|---------|-------------------------------------------|
| Function (JOA) (1, RCTs)[148]                                | Thread-embedding acupuncture (30)         | UCT (30)   | MD 2.03 (0.30,3.76, p=0.02)        | 60 (1)  | The higher score, the more improvement    |
| CQ14. Total clinical effective rate (6, RCTs) [160, 162-166] | Thread-embedding acupuncture + aUCT (470) | UCT (420)  | RR 1.15 (1.09, 1.21, p<0.00001)    | 890 (6) | The higher score, the more effect         |
| Pain (2, RCTs))[160, 161]                                    | Thread-embedding acupuncture UCT (65)     | UCT + (65) | MD -1.75 (-2.16,-1.33, p<0.00001)  | 130 (2) | The lower score, the lower pain intensity |
| Function (ODI) (2, RCTs) [160, 161]                          | Thread-embedding acupuncture UCT (65)     | UCT + (65) | MD -12.94 (-17.25,-8.59,p<0.00001) | 130 (2) | The lower score, the more improvement     |
| Function (JOA) (1, RCTs) [160]                               | Thread-embedding acupuncture UCT (30)     | UCT + (30) | MD 2.37 (0.78,3.96, p=0.004)       | 60 (1)  | The higher score, the more improvement    |



| <b>Cupping</b>                                                          |               |       |                         |     |                          |
|-------------------------------------------------------------------------|---------------|-------|-------------------------|-----|--------------------------|
| CQ15.                                                                   | Cupping + UCT | UCT   | RR 1.43                 | 348 | The higher score,        |
| Total clinical effective rate (5, RCTs) [167-171]                       | (175)         | (173) | (1.27, 1.62, p<0.00001) | (5) | the more effect          |
| Pain (1, RCTs)[167]                                                     | Cupping + UCT | UCT   | MD -1.08                | 60  | The lower score,         |
|                                                                         | (30)          | (30)  | (-2.24,-0.08, p=0.07)   | (1) | the lower pain intensity |
| UCT, Usual conventional treatment; MD, mean difference; RR, risk ratio; |               |       |                         |     |                          |
