# Supplementary material for: Korean Medicine Clinical Practice Guidelines for Lumbar Herniated Intervertebral Disc in Adults: Based on Grading of Recommendations Assessment, Development and Evaluation (GRADE)
Source: Healthcare (Basel). 2022 Jan 27;10(2):246. doi: 10.3390/healthcare10020246 (PMC8871943; doi:10.3390/healthcare10020246)
Supplement: Supplementary file 1 [file healthcare-10-00246-s001.zip]

Archive with 5 entries (5 files):
- Supplementary S1.pdf
- Supplementary S2.pdf
- Supplementary S3.pdf
- Supplementary S4(forest flot).pdf
- Supplementary S5(AGREE checklist).pdf
